1                   **High-quality genome and methylomes illustrate features**  
2                   **underlying evolutionary success of oaks**

3           Sork, Victoria L.<sup>1,2\*</sup>, \*\*, Shawn J. Cokus<sup>3\*\*</sup>, Sorel T. Fitz-Gibbon<sup>1\*\*</sup>, Aleksey V. Zimin<sup>4,5</sup>, Daniela  
4           Puiu<sup>4</sup>, Jesse A. Garcia<sup>1</sup>, Paul F. Gugger<sup>6</sup>, Claudia L. Henriquez<sup>1</sup>, Ying Zhen<sup>1</sup>, Kirk E. Lohmueller<sup>1,7</sup>,  
5           Matteo Pellegrini<sup>3</sup>, Steven L. Salzberg<sup>4,8</sup>

6   **Affiliations:**

7   <sup>1</sup> Department of Ecology and Evolutionary Biology, University of California, Los Angeles, CA  
8       90095-1438

9   <sup>2</sup> Institute of the Environment and Sustainability, University of California, Los Angeles, CA 90095

10   <sup>3</sup> Department of Molecular, Cell, and Developmental Biology, University of California, Los  
11       Angeles, CA 90095-7239

12   <sup>4</sup> Center for Computational Biology, Whiting School of Engineering, Johns Hopkins University,  
13       Baltimore, Maryland 21218

14   <sup>5</sup> Department of Biomedical Engineering, Johns Hopkins University, Baltimore, Maryland 21218

15   <sup>6</sup> University of Maryland Center for Environmental Science, Appalachian Laboratory, Frostburg,  
16       MD 21532

17   <sup>7</sup> Department of Human Genetics, David Geffen School of Medicine, University of California, Los  
18       Angeles, CA 90095

19   <sup>8</sup> Departments of Biomedical Engineering, Computer Science, and Biostatistics, Johns Hopkins  
20       University, Baltimore, Maryland 21218

21  
22   \*Corresponding author: Victoria L. Sork, [vsork@ucla.edu](mailto:vsork@ucla.edu)

23   \*\*Authors contributed equally

24  
25   **Short title:** Genome and methylomes of a California oak

## 26 Abstract

27 The genus *Quercus*, which emerged ~55 million years ago during globally warm temperatures,  
28 diversified into ~450 species. We present a high-quality *de novo* genome assembly of a  
29 California endemic oak, *Quercus lobata*, revealing features consistent with oak evolutionary  
30 success. Effective population size remained large throughout history despite declining since the  
31 early Miocene. Analysis of 39,373 mapped protein-coding genes outlined copious duplications  
32 consistent with genetic and phenotypic diversity, both by retention of genes created during the  
33 ancient  $\gamma$  whole genome hexaploid duplication event and by tandem duplication within families,  
34 including the numerous resistance genes and also unexpected candidate genes for an  
35 incompatibility system involving multiple non-self-recognition genes. An additional surprising  
36 finding is that subcontext-specific patterns of DNA methylation associated with transposable  
37 elements reveal broadly-distributed heterochromatin in intergenic regions, similar to grasses  
38 (another highly successful taxon). Collectively, these features promote genetic and phenotypic  
39 variation that would facilitate adaptability to changing environments.

## 40 Introduction

41 Oaks are a speciose tree genus of the temperate forests of the northern hemisphere (from  
42 Canada to Mexico in North America, Norway to Spain in Europe, and China to Borneo in Asia)  
43 <sup>1,2</sup>. The genus evolved in the palearctic during a time when the earth experienced a warmer  
44 climate <sup>3</sup>. Fossil records indicate that sections within the genus — *Quercus*, *Lobatae*, and  
45 *Protobalanus* — were already present in the arctic during the middle Eocene 47.8–38 Mya <sup>3</sup>. As  
46 the planet cooled, oaks disappeared from the arctic and migrated southward, speciating as they  
47 spread over Asia, North America, and Europe. Throughout these regions, the resultant species  
48 were the foundational constituents of their plant communities <sup>3</sup>. This genus, which has  
49 diversified into two subgenera, eight sections, and more than 400 species <sup>4</sup>, is an “evolutionary  
50 success story” <sup>1</sup>. In North America, oaks have more biomass than any other woody plant genus,  
51 including pines <sup>5</sup>, making this genus an ecological success story as well. As dominant species,  
52 oaks play pivotal roles in shaping biodiversity, creating healthy ecosystems, and sequestering  
53 carbon needed to mitigate climate warming. Throughout human history, they have provided  
54 valuable food, housing, materials, and cultural resources across multiple continents. Here we  
55 seek insights from the oak genome to uncover mechanisms that underlie the success of oaks.

56 We report details of a high-quality annotated chromosome-level genome assembly for *Quercus*  
57 *lobata* Née (valley oak; tree SW786) and associated tissue-specific methylomes. We analyze  
58 sequence trends of heterozygosity in valley oak and the European pedunculate oak (*Q. robur*)  
59 to show that effective population size ( $N_e$ ) has declined over time, but remained sufficiently  
60 large since divergence from a common ancestor to retain high levels of genetic variation. Large  
61  $N_e$  could help response to selection as the environment has changed over the last 50 million  
62 years. Further, our analysis of tandemly duplicated genes identifies large numbers of duplicated  
63 families, which, as Plomion et al. <sup>6</sup> also report, are particularly enriched for resistance genes and  
64 are likely associated with longevity and the eternal “arms race” with pests. We discover a large  
65 tandemly duplicated gene family that may be part of a previously undescribed non-self-

66 recognition system that could prevent self-fertilization and promote outcrossing, or selectively  
67 allow occasional hybridizations. We also find many genes retained from the ancient  $\gamma$   
68 paleohexaploid duplication event of the core eudicots. These are enriched for transcription  
69 factors and housekeeping genes, which may be more subject to strong (hard) selective sweeps  
70 than the tandemly duplicated genes<sup>7</sup>. Finally, we find some surprising similarities with the  
71 genomes of Poaceae (grasses — also highly successful plants). DNA methylation (BS-  
72 Seq) patterns indicate heterochromatin-rich chromosome arms, and additionally show CHH  
73 methylation peaks upstream of transcription start sites. Such prominent “mCHH islands” are  
74 known in maize<sup>8</sup> and a few other plants. These features could both affect gene expression and  
75 also facilitate tandem duplication events creating phenotypic variation and opportunities for  
76 selection.

## 77 Results

78 **Genome assembly.** An initial draft genome (version 1.0)<sup>9</sup> was assembled from small ( $\approx 150\times$   
79 coverage) and large insert ( $\approx 50\times$ ) Illumina paired end reads. The final assembly (version 3.0) was  
80 constructed with the addition of Pacific Biosciences long reads ( $\approx 80\times$ ) and Hi-C long-range links  
81 produced by Dovetail Genomics and the HiRise re-scaffolder<sup>10</sup>, dramatically increasing NG50  
82 scaffold size from 2 kbp to 75 Mbp (see **Methods**). The twelve longest scaffolds  
83 (“chromosomes”) were named and oriented to agree with pedunculate oak *Q. robur*<sup>6</sup>, and  
84 correspond (in order, but not generally orientation) with the twelve linkage groups (LGs) of an  
85 existing moderate-density physical map of *Q. robur* x *Q. petraea*<sup>11</sup> that we did not use during  
86 sequence construction. This physical map consists of 4,217 sequence context-defined single  
87 nucleotide polymorphism (SNP) markers (after dropping 22 SNPs associated to two physical  
88 locations each). The LGs and our chromosomes show a predominantly monotonic one-to-one  
89 correspondence (e.g., chr. 1 in [Figure 1A](#); see details in [SI Section II: Validation and orientation](#)  
90 [of chromosomes, Figures S1 and S2, and Table S2](#)). 99% of SNPs had at least one BLASTN  
91 alignment to our genome, and 98% of these had at least one alignment to the same  
92 chromosome as its LG. (95% of SNPs had all alignments to the same chromosome, and 86% had  
93 a unique alignment.) A small stretch of our chromosome 1 was found to be a mis-assembled  
94 mitochondrial sequence and was replaced by a gap of the same length ([Figure S3](#)).

95 A comparison of our assembly with the two others available for *Quercus* — a chromosomal-  
96 level one for *Q. robur*<sup>6</sup> and a short-scaffold one for cork oak *Q. suber*<sup>12</sup> — revealed high  
97 similarity, despite  $\approx 35$ M years since a common ancestor<sup>13</sup>. This similarity is both at the level of  
98 repeats (see **Repetitive sequences**), as well as non-repetitive non-gap sequence where LASTZ  
99 aligns 88% of *Q. lobata* to *Q. robur* with average nucleotide identity 96%, and 86% of *Q. lobata*  
100 to *Q. suber* with average 93% identity. The larger contributing alignments tend to have even  
101 higher identity; e.g., the longest alignments capturing half of *Q. lobata* have average identity  
102 98% for *Q. robur* and 95% for *Q. suber*.

103 Our assembly is characterized by much higher contiguity than the other two. For example,  
104 comparing *Q. lobata* vs. *Q. robur* and *Q. suber*, the number of gapless runs (“contigs”) is more  
105 than an order of magnitude smaller at 3.7k vs. 43k and 49k, respectively; N50 for gapless runs is

106 more than 20-fold larger at 966 kbp vs. 37 kbp and 45 kbp; and N90 is also more than 20-fold  
107 larger at 205 kbp vs. 10 kbp and 9 kbp. Comparing a representative 1 Mbp from *Q. lobata* and  
108 the syntenic 1 Mbp from *Q. robur* (Figure 1B), the former has a single gap of 1 kbp while the  
109 latter has 28 kbp in 48 gaps of 1 bp to 5 kbp each. This pattern is typical: over all 1 Mbp regions  
110 from chr. 1–12, *Q. lobata* has median 1–2 gaps (97% of regions have  $\leq 5$ ), but *Q. robur* has 50–  
111 51 (97% having  $\geq 32$ ). Our assembly reaches telomeric repeats on both ends of four  
112 chromosomes, and on one end of four more. (Telomeric repeats, centromeres, and rDNA are  
113 discussed in SI Section V: Repetitive sequences.) Visualizing the entire *Q. lobata* and *Q. robur*  
114 assemblies (Figure 1C), *Q. robur* gaps appear nearly solid. The percent of non-gap sequence  
115 placed in a chromosome is 96% in valley oak vs. 88% in pedunculate oak (and 0% in cork oak).  
116 The three assemblies differ considerably in total Mbp of non-gap sequence: 845 Mbp for valley  
117 oak vs. 791 Mbp and 934 Mbp for pedunculate and cork oak, respectively. However, there are  
118 three *Q. suber* scaffold populations by length, and the longest — those  $\geq \approx 50$  Kbp — total a  
119 more comparable 837 Mbp. More than a third of *Q. robur* and *Q. suber* base pairs are closer  
120 than a median gene span (5 kbp) to an assembly gap or sequence edge, while 96% of *Q. lobata*  
121 base pairs are further away (Figure 1D).

122 Apparent segmental rearrangements and inversions between *Q. lobata* and *Q. robur* were  
123 unexpectedly prevalent (e.g., Figure 1E left shows chr. 1 vs. chr. 1 as typical). Most of these,  
124 however, are likely scaffolding errors in *Q. robur*. Pedunculate oak has much smaller contigs,  
125 and its scaffolding was constructed using linkage maps (which are low in resolution compared  
126 to Hi-C) as well as synteny to *Prunus*, which may lead to mistakes in order and orientation of  
127 contigs (especially for small contigs). By contrast, alignments of *Q. lobata* with more distant  
128 species (*Populus*, *Eucalyptus*, *Theobroma*, and *Coffea*) showed numerous and widespread  
129 regions in continuous syntenies where *Q. robur* was not as continuous; to illustrate, Figure 1E  
130 right shows Mbp-scale regions of chr. 3 of the two *Quercus* vs. chr. 1 of *Populus*. Further,  
131 comparison of the formerly mentioned LGs from *Q. robur* x *Q. petraea* to both the *Q. lobata*  
132 and *Q. robur* assemblies shows *Q. robur* with more disagreements (Figures S1, S2). Thus, with  
133 the currently available *Q. robur* assembly, we conclude that alignments of *Q. robur* versus, e.g.,  
134 *Q. lobata* are not reflective of true rearrangements and inversions.

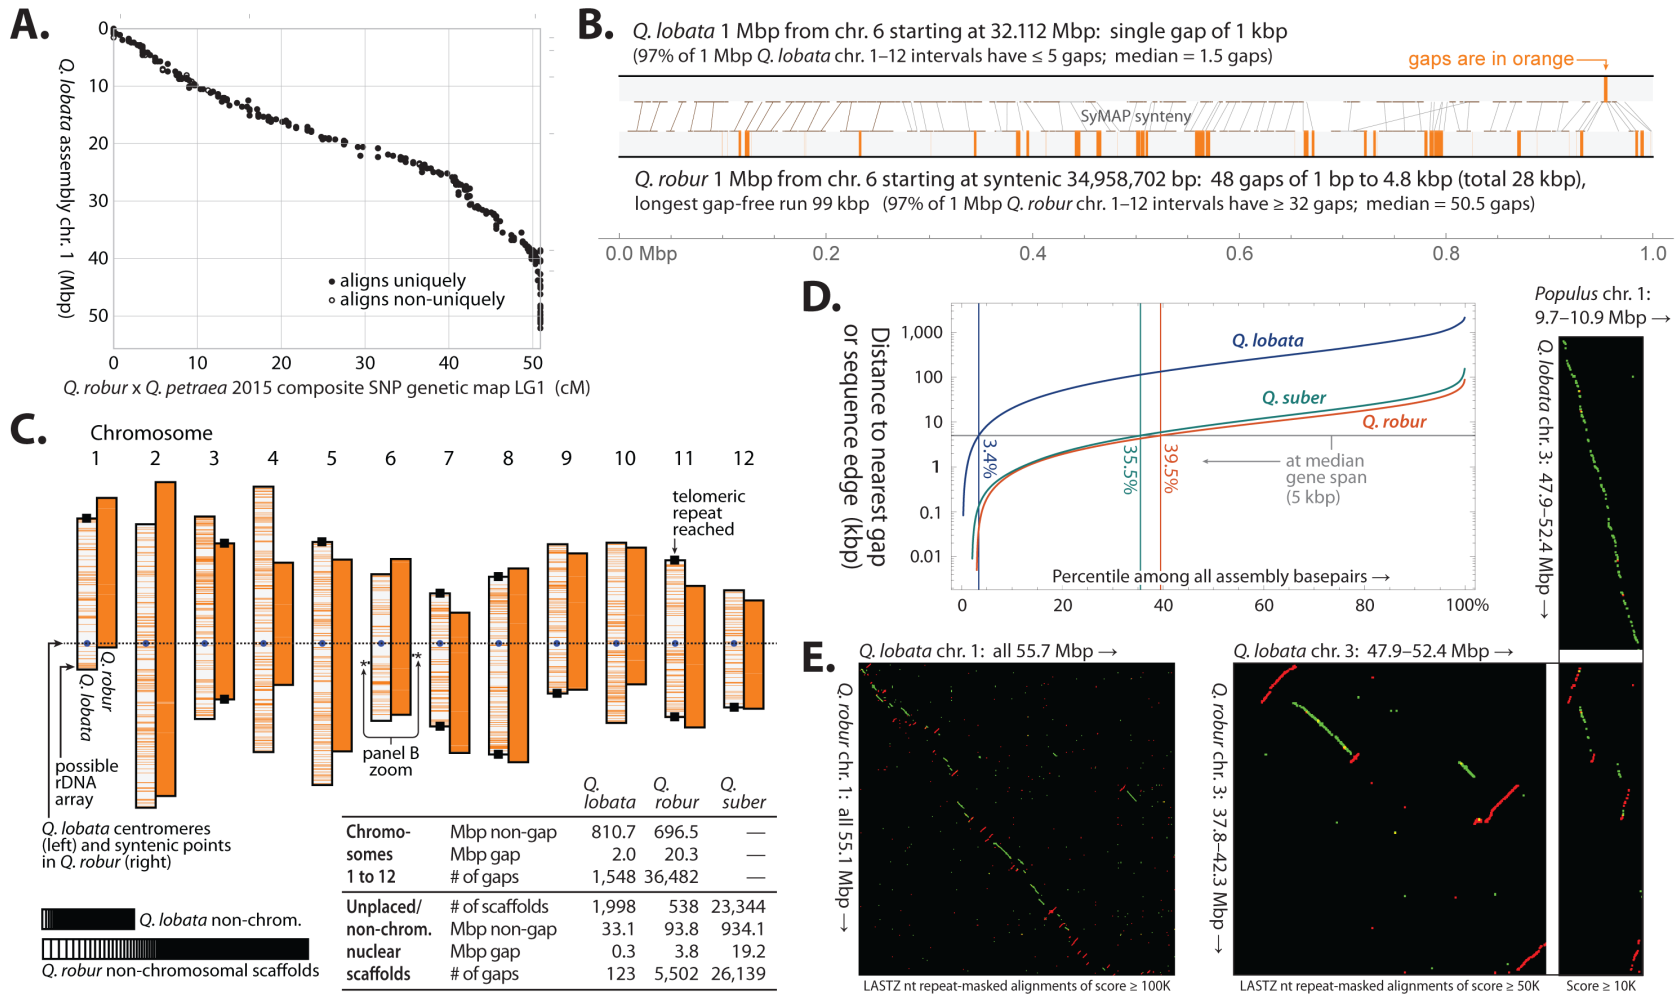

135

136 **Figure 1:** Overview of assemblies of *Q. lobata* tree SW786 (version 3.0), *Q. robur* (version PM1N)<sup>6</sup>, and *Q. suber* (version 1.0)<sup>12</sup>. (A) Alignment of a physical  
 137 map linkage group 1 to *Q. lobata* chr. 1, exhibiting high concordance and overall monotonicity. (B) A representative 1 Mbp region from the *Q. lobata* assembly  
 138 (top) and the syntenic 1 Mbp region from the *Q. robur* assembly (bottom), showing gaps in orange. (C) Overview of the chromosome-level assemblies  
 139 (*Q. lobata* left member of each pair, *Q. robur* right) with orange lines indicating gaps, and basic statistics for all three assemblies. (D) Distributions of distance  
 140 from a random base pair to the nearest gap or sequence edge. (E) Nucleotide alignments of entire chr. 1 of *Q. lobata* and *Q. robur*, showing numerous  
 141 apparent rearrangements and inversions, in contrast to a more detailed illustrative region between chr. 3 of the two *Quercus* with chr. 1 of more distant  
 142 *Populus trichocarpa*<sup>14</sup>, in which the *Q. lobata* assembly is straight-line syntenic with *Populus* but that of *Q. robur* is not. Alignments between nominal  
 143 same/opposite strands are colored green/red.

144 **Demographic histories of *Q. lobata* and *Q. robur*.** Ancient oaks evolved over 50 Mya, initially in  
145 the subtropical climate of the palearctic of the Northern Hemisphere and, as the planet cooled,  
146 shifting southward to their contemporary distribution throughout the Northern Hemisphere  
147 (Figure 2A). Consistent with the large range, we found heterozygosity (average 0.50%–0.66%;  
148 see SI Section III: Analysis of heterozygosity, and Figures S4, S5) across the genome to be similar  
149 to but slightly less than the 0.73% computed for *Q. robur*, possibly due to the much larger  
150 species range of pedunculate oak and/or lower representation in the *Q. robur* assembly of  
151 highly homologous sequence loci resulting in increased post-alignment pileup of multiple actual  
152 loci at single assembly loci. To gain insight into the population history of oaks, we inferred the  
153 effective population size ( $N_e$ ) of *Q. lobata* and *Q. robur* over time. The Pairwise Sequentially  
154 Markovian Coalescent (PSMC') method<sup>15</sup> applied to the individuals used to build the genomes  
155 mapped to their own assemblies (Figure 2B) enabled examination of the last ≈25M years of  
156 evolution (Figure S7). To verify accurate inference on this timespan, we generated simulated  
157 datasets using the inferred demographic history. We selected ancestral population sizes  
158 matching empirical genome-wide heterozygosities (see Methods and SI Section IV:  
159 Demographic analysis, and Figures S8, S9, and S10), and display these in Figure 2C.

160 We ran PSMC' on data simulated under trimmed demographic models and found accurate  
161 inference of population size over time, except for the single oldest time step where population  
162 sizes were often over-estimated (Figure 2D). The PSMC' analysis indicates ancestral populations  
163 of both *Q. lobata* and *Q. robur* had high (>500k) effective population sizes that then showed  
164 initially similar declines, perhaps as populations were shifting southward (Figure 2C). *Q. lobata*  
165 shows an additional decline in  $N_e$  at ≈5 Mya, which would have occurred after the shift from a  
166 period of subtropical climate with year-round rainfall to a Mediterranean climate with summer  
167 drought<sup>16</sup>. By contrast, for *Q. robur* (being more widely distributed throughout Europe),  $N_e$   
168 remained relatively flat until the last ≈1M years. At this point, *Q. robur* declines to  $N_e < 50k$  (and  
169 below *Q. lobata*) during the “Ice Ages” when the region was experiencing a series of warm and  
170 cold periods creating genetic bottlenecks and expansions (Figure 2C and D). Both species have  
171 retained sufficiently large effective population sizes to facilitate natural selection<sup>17</sup>.

172 **Repetitive sequences.** As with many plant species, the valley oak genome contains substantial  
173 repeats, with 54% of non-gap base pairs marked as repetitive by RepeatMasker in combination  
174 with a species-specific database constructed by RepeatModeler+Classifier (Figure 3A and B; the  
175 modeling step was essential, as RepBase only marked 13%). The largest identified portion is  
176 transposable elements (TEs), primarily Copia and Gypsy elements of the long terminal repeat  
177 (LTR) type. The level of repetitiveness is similar to the 54% (disregarding gaps) found by  
178 application of the same process to *Q. robur* (for which Plomion et al.<sup>6</sup> reported 52% via REPET  
179 and other annotation, including manual curation). RepeatModeler+Classifier also detects 51%  
180 in *Q. suber*<sup>12</sup>, 55% in *Eucalyptus*<sup>18</sup>, 55% in *Theobroma*<sup>19</sup>, 51% in *Coffea*<sup>20</sup> and 43% in *Populus*<sup>14</sup>.  
181 Centromeric, telomeric, and rDNA repeats for valley oak were identified (see SI Section V:  
182 Repetitive sequences), and specific sequence-defined repeat superfamilies are correlated or  
183 anticorrelated to various levels with centromeric proximity, forming (as do protein-coding gene  
184 exons) density gradients that are the main chromosome-scale repeat-associated features,  
185 presumably reflecting overall chromatin structure (Figures S11, S12, and Figure 3C–D).



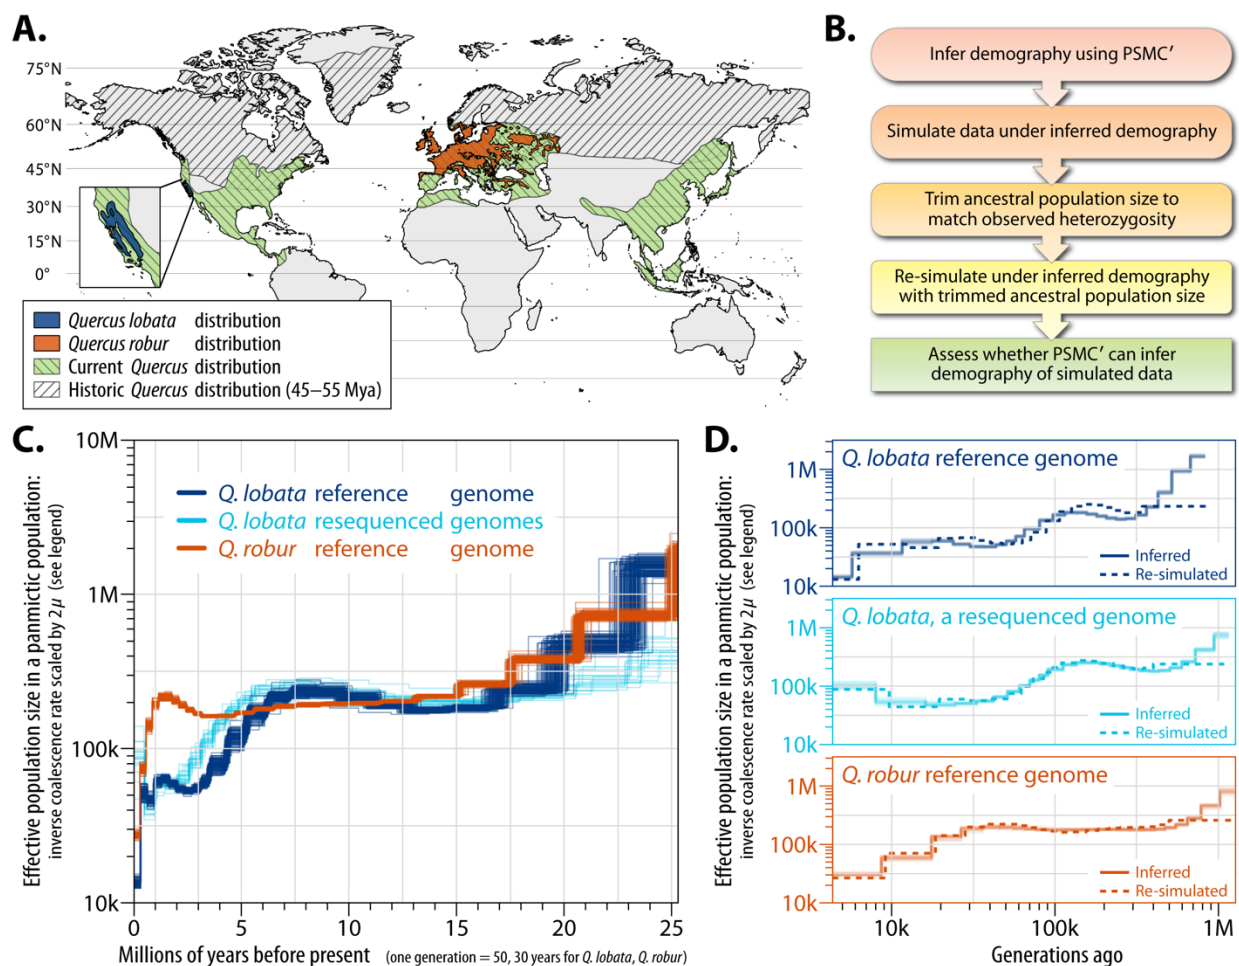

186

187 **Figure 2:** Demographic evolutionary history analysis of *Q. lobata* and *Q. robur*. **(A)** Historic and contemporary species ranges  
188 based on Barrón, et al. <sup>3</sup> and fossil occurrence records from the Global Biodiversity Information Facility website ([GBIF.org](http://www.gbif.org)  
189 19th January 2019, <https://doi.org/10.15468/dl.kotc15>). Contemporary distribution of *Q. robur* is from the European Forest  
190 Genetic Resources Programme (<http://www.euforgen.org/species/quercus-robur/>); *Q. lobata* is based on Griffin and  
191 Critchfield <sup>21</sup>. **(B)** Stages of the analysis. **(C)** Inferred effective population sizes over time via PSMC' (100 bootstraps shown  
192 per condition), using a mutation rate of  $1.01 \times 10^{-8}$  bp per generation (see SI Section IV: Demographic analysis and Figure S6  
193 for other parameters). **(D)** PSMC' accurately infers demography (solid) on data simulated (dashed) under models fit to the  
194 empirical data.

195 The repeat content of *Q. lobata*, *Q. robur*, and *Q. suber* are very similar at the sequence level.  
196 There are six combinations in which RepeatModeler can be used to build a species-specific  
197 repeat consensus database from one of the three *Quercus* assemblies, which can then be  
198 applied by RepeatMasker to one of the two other assemblies. In all six combinations, 89% to  
199 92% of non-gap base pairs are marked the same way (repetitive or not repetitive) as when the  
200 native consensus database for the species being masked is used.

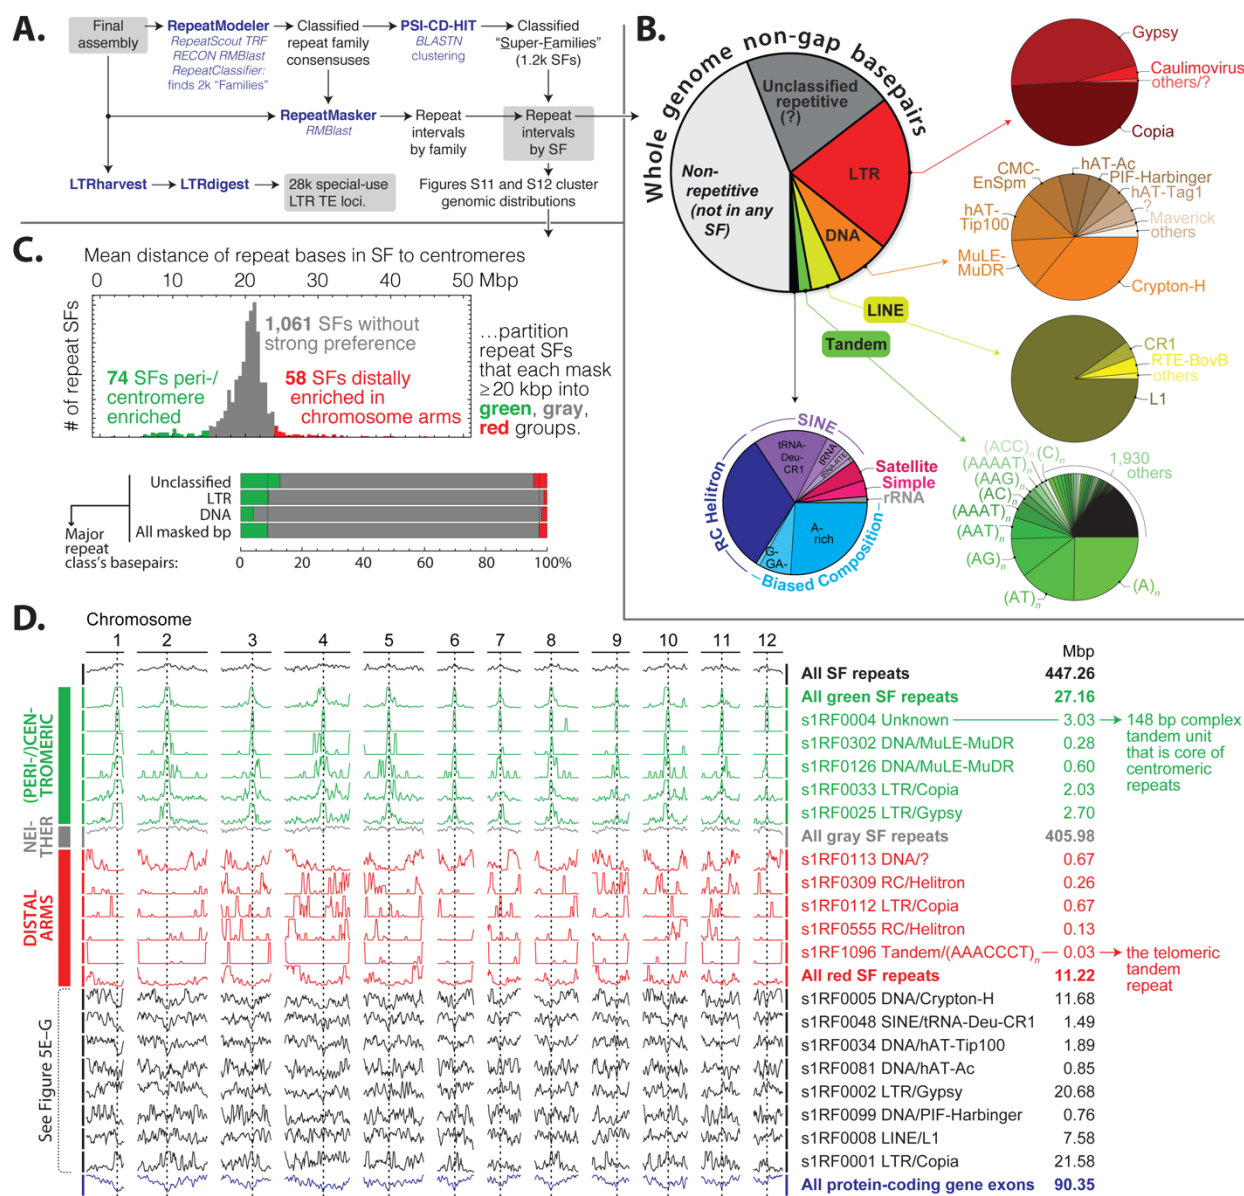

201  
202 **Figure 3:** Dispersed and local (tandem/satellite, simple/biased composition) repetitive sequence in *Q. lobata*. **(A)**  
203 Primary analysis outline. **(B)** Assembly partitioned into RepeatClassifier/RepeatMasker major and minor classes;  
204 54% of non-gap base pairs are covered by repeat superfamilies (SFs), and transposable elements (TEs) are  
205 prevalent. **(C)** Unsupervised comparisons of how the 1,193 individual SFs each with  $\geq 20$  kbp distribute across  
206 chromosomes (Figures S11 and S12) suggest the primary distributional diversity at chromosome scale is proximity  
207 to centromeres (green, 74 SFs totaling 27 Mbp) vs. telomeres (red, 58 SFs totaling 11 Mbp) vs. more-or-less  
208 uniformity (gray, 1,061 SFs totaling 406 Mbp). **(D)** Chromosomal distribution of selected SFs and sets of SFs,  
209 illustrating the diversity across and within the trichotomy of (C). The y-axis in each row is linear number of member  
210 base pairs in 3 Mbp bins every 1 Mbp, with zero at the lower edge and 95th percentile (or row maximum if the  
211 percentile is zero) at the upper edge. Black rows near the bottom are the representative SFs of Figure 5E–G.

212 **Gene prediction and annotation.** Using the AUGUSTUS gene modeler<sup>22</sup> and a diverse set of  
213 experimental data (Iso-Seq, RNA-Seq, DNA methylation) and *in silico* data (known proteins,  
214 repeats), we modeled 68k putative protein-coding genes (PCGs) (see **Methods**, Figure 7A and



215 **Table S3**). As many corresponded to transposons with little expression or appeared  
216 hypothetical for other reasons, we removed 29k to obtain the primary set of 39,373 PCGs we  
217 report, of which 35k have at least one intron and all of which have UTRs annotated and are  
218 ostensibly complete. *Q. robur* reports only 29k PCG models, of which just 20k have introns, and  
219 about half UTRs; in the other direction, *Q. suber*'s annotation by NCBI (thinned to one isoform  
220 per locus) reports more 49k PCG loci (about half with UTRs), but a more comparable 36k with  
221 introns and 38k ostensibly complete, and with a much higher number containing transposon  
222 domains by comparison.

223 We assigned gene names, functions, and orthologs via the PANTHER and Pfam components of  
224 InterProScan, and OMA<sup>23</sup>. We evaluated the *Q. lobata*, *Q. robur*, and *Q. suber* scaffolds and  
225 single isoform PCG model sets with BUSCO (**Figure 7B**). *Q. lobata* compares favorably to the  
226 other two, and does not have the high multicopy anomaly of *Q. suber* in the 303-USCO ODB9  
227 Eukaryota set<sup>24</sup>, or the high missing and fragmented fraction of *Q. robur*'s small model set  
228 (especially with the more comprehensive 2,121-USCO set for Eudicotyledons from ODB10).

229 **Gene duplications.** Protein–protein alignments among the *Q. lobata* PCGs exposed a rich  
230 panoply of duplication structure in terms of genomic positions, ages, and functions. Prominent  
231 and complex tandem-like blocks of high-similarity genes can be seen via visualizations of all–  
232 vs.–all alignments (see **Methods**). These duplications often involve local rearrangements, and  
233 can extend into megabases with dozens of genes involved at a time. **Figure 4A** (left third)  
234 exhibits two illustrative 5 Mbp regions of chr. 4. Approximately 40% of PCGs participate in these  
235 blocks, which have sizes of two to ~100 genes each, with larger sizes rarified like a power law  
236 (**Figure S13**). Roughly a third of participating genes are duplicated only once, slightly more than  
237 half two to 20 times, and only a tenth more than 20 times. Visualizations (e.g., coordinated  
238 **Figure 4A** middle third) of the synonymous codon substitution rate ( $K_s$ ) over gene pairs in blocks  
239 suggest a wide variety of ages for the majority of retained expansion for individual blocks.  
240 Larger blocks tend to be older (**Figure 4F** colored distributions), but even old blocks tend to  
241 have younger points suggestive of ongoing growth. While numerous tandem gene copies are  
242 shorter or have reduced or no RNA-Seq evidence of expression, many copies (even within larger  
243 blocks) are not particularly short or of lower expression and so do not appear to be  
244 pseudogenes. Functions of tandemly duplicated genes are diverse, as evident from the variety  
245 of Pfam domains they contain (e.g., coordinated **Figure 4A** right third). Relatively few distinct  
246 domains, however, are strongly enriched over all tandemly duplicated genes, and include NB-  
247 ARC, LRR\_8, B\_lectin, LRR\_1, TIR\_2, LRRNT\_2, p450, TIR, and PGG (associated with  
248 resistance/defense); Pkinase\_Tyr and Pkinase (signal transduction); UDPGT (the large UDP-  
249 glucuronosyl/glucosyl transferase family); S\_locus\_glycop, PAN\_2, and DUF247 (see below); F-  
250 box, FBA\_3, and FBA\_1 (protein–protein interactions/degradation, signal transduction and  
251 regulation); and GST\_N, GST\_N\_3, and GST\_N\_2 (glutathione S-transferases, with functions  
252 including stress tolerance/signaling and detoxification).

253 Many of the strongly enriched domains are part of the domain architecture of plant disease  
254 resistance genes (R-genes) identified by Gururani, et al.<sup>25</sup>. It is difficult to be sure whether an  
255 R-5gene is actually acting as a pathogen defense mechanism in a given plant species, but

256 Gururani, et al.<sup>25</sup> reviewed the experimental evidence and identified eight classes of R-genes  
257 based on the arrangements of domains and structural motifs. Using their criteria for domain  
258 combinations ( see [Supplementary Information, Section VI. R-gene identification](#)), we analyzed  
259 the domain architecture of 39373 *Q. lobata* proteins and found 751 R-genes, which contained  
260 the highly likely combination of domains involved in R-genes, and another 2176 genes that are  
261 good candidates for R-genes because they include enough qualifying features ([Table S4](#)). For  
262 the *Q. robur* annotation (25,808 proteins)<sup>6</sup>, we counted 632 R-genes plus 1645 candidate R-  
263 genes and for *Q. suber* (49,388 proteins)<sup>12</sup>, we found 723 R-genes plus 2182 candidate R-genes  
264 ([Table S4](#)). These numbers are based on the predicted gene models from each genome rather  
265 than DNA sequences, and the differences among species are more likely to represent  
266 differences across annotations rather than differences in DNA sequences. Collectively they  
267 document high levels of R-genes in oaks and illustrate tremendous opportunity for plant  
268 defense mechanisms.

269 **Possible DUF247-based non-self-recognition system.** An investigation of PCGs found in blocks  
270 containing at least 30 tandemly duplicated genes uncovered DUF247 (PF03140) as the most  
271 enriched Pfam domain ([Table S5](#); also see large block in [Figure 4A](#)). The only known suggested  
272 function for DUF247-containing genes (“DUF247 genes”) is from the Poaceae family, where two  
273 DUF247 genes in rye grass segregate with each of two known self-recognition loci and are  
274 proposed to be the male determinants of a multi-locus self-incompatibility system<sup>26,27</sup>. Among  
275 the evidence is a self-compatible rye grass species with a disrupted DUF247 gene<sup>26</sup>. If the  
276 DUF247 gene family affects self-recognition in oaks, the extensive duplication suggests a non-  
277 self rather than a self-recognition system<sup>28,29</sup>. This type of system has been demonstrated in  
278 Solanaceae, e.g., petunia<sup>30</sup> and tomato<sup>31</sup>, Rosaceae, e.g., pear and apple<sup>32</sup>, and Plantaginaceae,  
279 e.g., snapdragon<sup>33</sup>. In these, the S-locus includes a single female determinant gene (S-RNase)  
280 and commonly seven to 20 linked paralogs of male determinant F-box genes (SLFs). In  
281 snapdragon<sup>33</sup>, up to 37 linked male determinant SLF genes were observed, while (at the other  
282 extreme) *Prunus* species have a single F-box gene for the male determinant and appear to have  
283 adopted an S-RNase-based self-recognition system rather than non-self-recognition<sup>34</sup>,  
284 demonstrating the feasibility of transitioning from one to the other. The span of the large  
285 DUF247 block ([Figure 4A](#)) contains 34 predicted PCGs with a complete DUF247 domain, 22 with  
286 partial DUF247 domains, and 17 additional genes. Among the 17 additional genes are two  
287 pectinesterase inhibitor-like genes shown to be involved in regulating pollen tube growth in  
288 maize<sup>35</sup>, a pectin depolymerase gene, two E3 ubiquitin ligases that have been shown to confer  
289 self-incompatibility when transplanted to *Arabidopsis*<sup>36</sup>, a DNA helicase, and 11  
290 uncharacterized genes. DUF247 genes are entirely specific to plants and usually carry a single  
291 copy of the domain that comprises almost the entire gene. Across the 104 plant genomes in  
292 Pfam Release 33.1<sup>37</sup> with  $\geq 17,500$  predicted protein entries (to restrict to genomes most likely  
293 to be complete), the top five by number of DUF247 domain occurrences are three tree species  
294 — *Juglans regia* (English walnut)  $n = 201$ ; *Eucalyptus grandis*,  $n = 188$ ; and *Populus trichocarpa*  
295 (black cottonwood),  $n = 161$  — and two polyploid cultivars (wheat,  $n = 192$ , and peanut,  $n =$   
296  $165$ ). These tree species, like *Q. lobata* ( $n = 186$ ), do not have identified incompatibility systems,  
297 are frequently highly outcrossing, and sometimes self-fertilize at low levels.

298 **Long-surviving duplicated genes.** Also striking in the visualizations of protein alignments were  
299 self-syntenic blocks (SSBs): syntenic runs of proteins within *Q. lobata*, generally between  
300 different chromosomes, with a variety of lengths and gene pair densities. [Figure 4B](#) (top) shows  
301 chr. 6 vs. chr. 12/3/9/2/11 as exemplary (although in low resolution per limited space). For  
302 further analysis, 236 SSB runs, each with four to hundreds of gene pairs, were extracted (e.g.,  
303 [Figure 4B](#) bottom) and given accessions “ssbXXYYZZ” with  $XX \leq YY$  indicating the chromosomes  
304 involved and ZZ as serial number; more than 7,100 PCGs are directly involved. High resolution  
305 examination made evident that, on any given chromosome, runs tended to end and begin close  
306 by, and for any particular point on a chromosome to be covered by very few runs (typically,  
307 zero to two), so that (nearly) disjoint SSBs could often be clearly ordered to form a small  
308 number of chromosome-scale chains ([Figure 4C](#) black bars). While a few recent segmental  
309 duplications appear, most SSBs are likely “ghosts” of the ancient genome triplication polyploidy  
310 event  $\gamma$  associated with early diversification of the core eudicots, thought to have occurred  
311 about 120 Mya<sup>38-40</sup>. The high age of many SSBs is supported by the synonymous substitution  
312 rate ( $K_s$ ) for gene pairs in SSBs in triplicated regions being very high (almost entirely  $> 1.0$ ;  
313 [Figure 4F](#) black distribution), as well as the generally short length and scattered nature of SSBs  
314 (which are within *Q. lobata*) compared to syntenies between *Q. lobata* and different species  
315 (*Populus*, *Eucalyptus*, *Theobroma*, and *Coffea*).

316 While general triplication is clear from the gene pair-defined SSBs (e.g., [Figure 4C](#) white bars,  
317 with green and red showing supporting gene pairs), few syntenic gene triples have been  
318 retained, and detection and characterization of the  $\gamma$  ghosts would be unrepresentative for an  
319 analysis restricted to gene triples. For example, in the gray shaded region of [Figure 4C](#) involving  
320 chr. 6/2/11 and spanning 320 chr. 6 genes, the 59 chr. 6 genes supporting local one-to-one  
321 chr. 6/2 synteny have only eleven chr. 6 genes in common with the 39 supporting local one-to-  
322 one chr. 6/11 synteny. Even before chaining as in [Figure 4C](#), two thirds of the genome are in a  
323 SSB ([Figure 4D and E](#)), with the largest fraction (34%) actually covered by two (consistent with  
324 triplication) and 27% by one (decayed triplications and a few recent segmental duplications); a  
325 third (34%) is not covered, and only 5% is covered by three or four SSBs (likely duplications post  
326 triplication). Relative to all genes, those in one or two gene pairs supporting SSBs tend to be of  
327 higher expression with lower repetitive sequence in their immediate vicinity, and are enriched  
328 for certain functional classes, including transcription factors and housekeeping genes  
329 ([Table S6](#)).

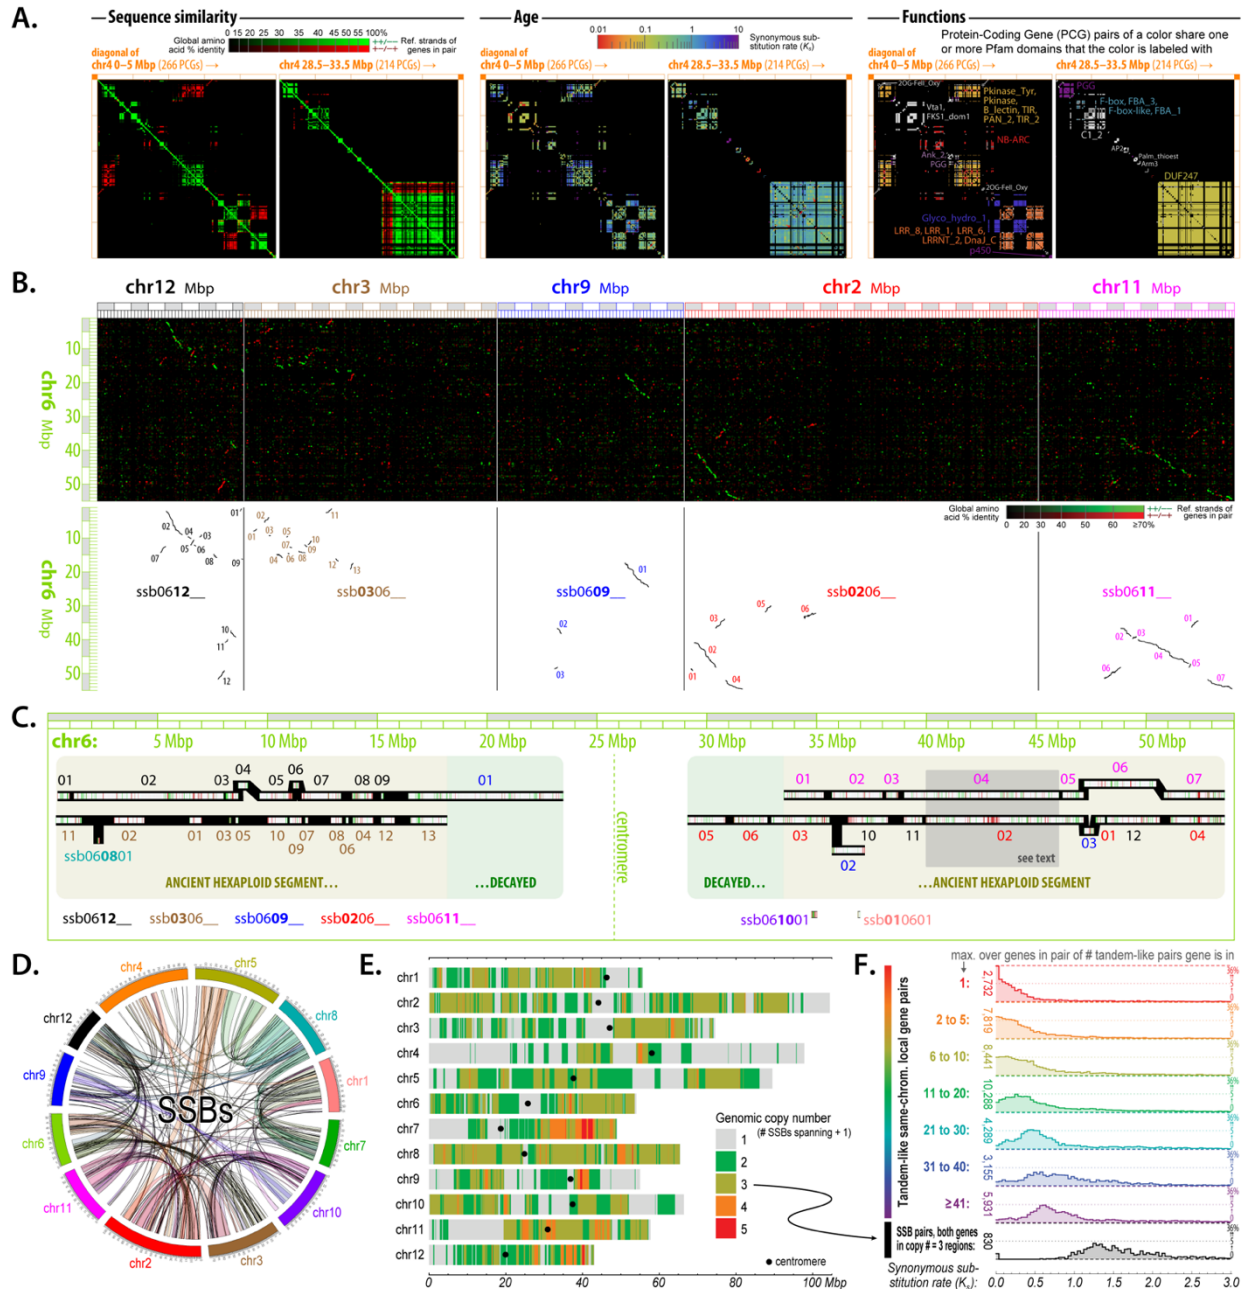

330  
331  
332  
333  
334  
335  
336  
337  
338  
339  
340  
341  
342  
343  
344

**Figure 4:** Duplicated protein-coding genes. **(A)** Sequence similarity (amino acid identity), age (synonymous substitution rate  $K_s$ ), and functions (shared Pfam domains) for all pairs of proteins within two illustrative 5 Mbp regions of chr. 4. Nearly half of *Q. lobata* PCGs are involved in tandem-like blocks of varying sizes (up to Mbp scales and dozens of genes at a time), often locally rearranged, and originating and growing at a variety of ages. Genes involved are diverse, but enriched in certain functions. **(B, C)** With no recent whole-genome polyploidization, most of the detected PCG syntenies of *Q. lobata* to itself ("SSBs") are small and diffuse and reflect the core eudicot triplication event  $\gamma$  over 100 Mya. Despite its age, this event remains quite evident — albeit highly fragmented, dispersed, and partially decayed. The whole of chr. 6 vs. the whole of chr. 12/3/9/2/11 are shown as exemplary. **(D, E)** SSBs [even without chaining as in (C)] cover much of the chromosomes. The highest fraction (34% of base pairs) is spanned by manifest triplication, 27% by duplication (while some duplication is recent, most appears to be decayed triplication), and 34% by no detected extant synteny. **(F)** The pairwise synonymous substitution rate ( $K_s$ ) tends to be very low for genes tandemly duplicated just once (red) and increases as tandem-like block size increases (orange to violet), suggesting larger blocks are older.  $K_s$  is essentially always extremely high ( $\geq \sim 1.0$ ) for SSB gene pairs where both pair-genes lie in chromosomal regions spanned by exactly two SSBs (black), supporting the syntenic triplications to be of ancient origin.



345 **Genome-wide patterns of DNA methylation and strong mCHH islands.** Whole-genome bisulfite  
346 sequencing for bud, catkin, and leaf tissue revealed mean DNA 5-methylcytosine methylation  
347 (BS-Seq) levels in CG (mCG) and CHG (mCHG) nucleotide contexts as relatively stable across  
348 tissues (Figure 5A and B), while levels in CHH (mCHH; Figure 5C) were notably higher in bud  
349 than catkin and young leaf, likely due to the increased proportion of undifferentiated meristem  
350 tissue<sup>41</sup>. Mean levels for regions surrounding genes are similar to genome-wide means for all  
351 tissues in all contexts (mCHH 1–7%, mCHG 39–43%, mCG 60–62%; Figure S14), with the  
352 exception of peaks of mCHH near transcription boundaries of genes (Figure 5C). These mCHH  
353 peaks are similar in both position and scale above background to the “mCHH islands” of maize  
354<sup>42,43</sup> (Auxiliary Spreadsheet 1). We examined mCHH across representative repeat superfamilies  
355 (SFs), specifically, those of highest mass within selected RepeatClassifier minor repeat classes,  
356 as seen in Figure 5E. Within genic regions, three SFs — s1RF0048 (“SINE tRNA-Deu-CR1”),  
357 s1RF0034 (“DNA transposon hAT-Tip”), and s1RF0099 (“DNA transposon PIF-Harbinger”) —  
358 were both high in mCHH and preferentially located in the highly methylated gene boundary  
359 regions (Figures 5E and F). Members of these SFs are found in both genic and non-genic regions  
360 with broadly similar mCHH levels (Figure 5G and Figure S15). However, in view of overall  
361 genome-wide mCHH levels (including centromeres and intergenic space), we find regions  
362 surrounding genes to be highly enriched for mCHH (Figure 5H). Similar enrichment patterns are  
363 seen in bud and leaf, despite different overall mCHH levels (Figure 5C and H), and similar  
364 patterns are also seen if mCHH window stringency is varied from 25% to 90%, although at these  
365 extremes we observe decreases in the relative amount of downstream and non-genic mCHH  
366 (Figure 5H). All methylation is typically low near transcription boundaries (Figure 5A), and  
367 remains low for mCHG and mCHH across gene bodies. However, gene body mCG rises for  
368 longer-genes, reaching near-background levels in the longest genes (Figure 5D).

369 **Broad distribution of heterochromatin.** *Q. lobata* appears to have heterochromatin dispersed  
370 throughout chromosomes more or less equally, with only minor increase of density toward  
371 centromeres. This interpretation is based on both the distribution of genes and repeats as well  
372 as indications of widespread histone-driven DNA methylation, a pattern more similar to maize  
373 and rice methylomes than to the *Arabidopsis* and tomato methylomes in which the methylated  
374 repeats are concentrated in pericentromeric heterochromatic regions<sup>44,45</sup>. As such, a majority  
375 of repeat mass does not show strong positional correlation with centromeres (Figure 3D gray).  
376 Also, 92% of PCGs have a RepeatMasker-defined repeat within the gene’s upstream 2 kbp,  
377 which is high, because among 34 angiosperms, reported numbers range from 29% (*Arabidopsis*)  
378 to 94% (*Zea mays*), with an average of 50%<sup>43</sup>. (See also Auxiliary Spreadsheet 1).



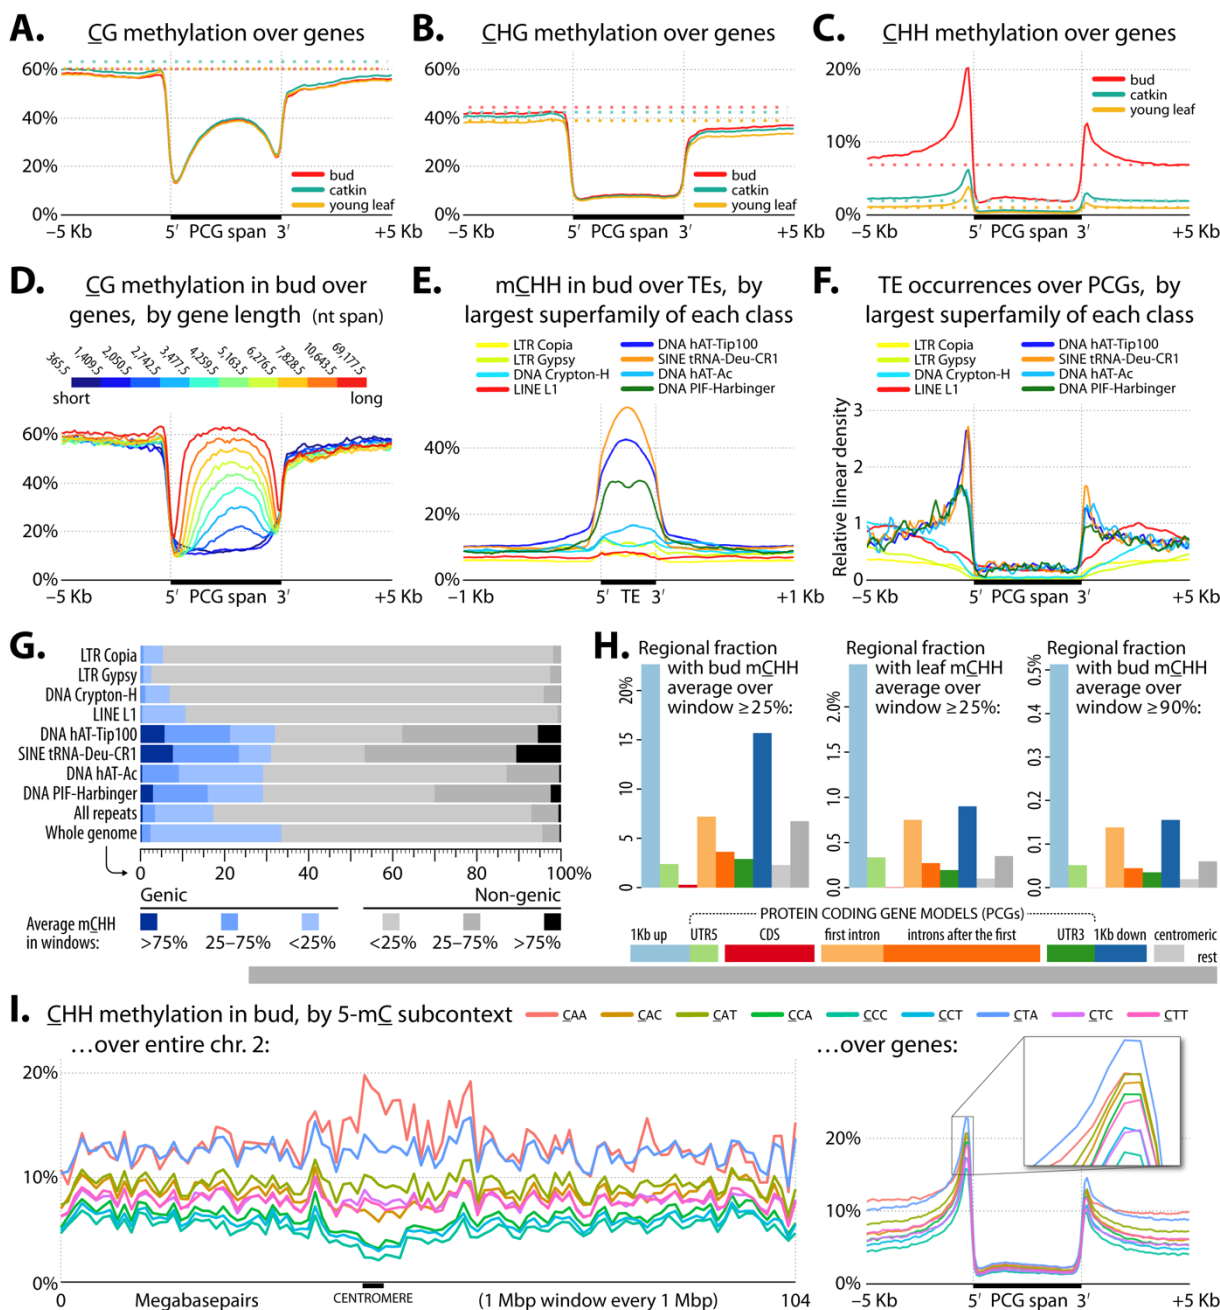

379  
 380 **Figure 5:** *Q. lobata* DNA methylation in protein-coding genes and repeats. **(A–C)** Average methylation levels (100  
 381 bp windows) with respect to PCGs (normalized to 5 kbp long) for the three sampled tissues (bud, catkin, and young  
 382 leaf) by methylation context: **(A)** CG, **(B)** CHG, and **(C)** CHH. Dotted lines show genome-wide backgrounds, and  
 383 TSS/TES = Transcription Start/End Site. **(D)** mCG for-genes in deciles by gene length. **(E)** Average bud mCHH (20 bp  
 384 windows) across representative repeat SFs (normalized to 400 bp long) in selected RepeatClassifier minor classes.  
 385 **(F)** Relative density of representative repeat SFs around genes (100 bp windows). **(G)** Distribution of mCHH for  
 386 representative repeat SFs (100 bp sliding disjoint windows). ‘Genic’ = gene spans enlarged by 1 kbp on each end.  
 387 **(H)** Partitioning of whole genome base pairs into nine types of regions vs. mCHH coverage. Lower horizontal bars  
 388 reflect relative size. Vertical bars show percent of each genomic context covered by 100 bp windows with mCHH >  
 389 25% or > 90% in bud or young leaf. **(I)** mCHH by 3 nt subcontext (queried cytosine is underlined, and is the first nt  
 390 of the three); **left side:** 1 Mbp windows across all of chr. 2, **right side:** across genes (normalized to 5 kbp length) in  
 391 bud tissue.

392 A second indication of heterochromatin-rich chromosome arms is the type of methylation  
393 found on intergenic repeats. Different mechanisms of generating plant mCHH, such as RNA-  
394 directed DNA Methylation (RdDM) or CMT3-mediated histone-associated methylation, have  
395 been shown to have distinct preferences for specific nucleotide subcontexts (finer than  
396 CG/CHG/CHH: CAA vs. CAC vs. ...). Histone-associated mechanisms are typically responsible for  
397 methylation of heterochromatin and have much stronger biases than RdDM<sup>44</sup>. *Q. lobata* has  
398 strong CHH subcontext preferences at chromosome scale (Figure 5I left and Figure S16). Bias  
399 patterns around centromeres are likely to indicate the general methylation pattern of  
400 heterochromatin in oaks, while chromosome arms represent a mix of genes and intergenic  
401 spaces. The peaks of mCHH surrounding gene boundaries (i.e., the mCHH islands) show a  
402 distinct pattern, with preference for CAA strongly reduced (Figure 5I right). Moving from gene  
403 boundaries toward intergenic space, the subcontext pattern progressively reverts to the likely  
404 heterochromatic signal of the centromeres (Figure S17).

405 An additional measure of the similarity in genome organization between oaks and grasses is the  
406 level of correlation between methylation and gene count across chromosomes. When we  
407 augment Figure 2D from Niederhuth et al.<sup>43</sup> with oak findings, oak is again found comparable to  
408 the grasses (Poaceae) and less to the other studied angiosperms (Figure 6A). The low mCHH  
409 and gene count correlation reflects a combination of unusually strong gene boundary mCHH  
410 islands relative to the background mCHH level (Figure S18 and Auxiliary Spreadsheet 1) and low  
411 average gene density in chromosome arms (Figure S19).

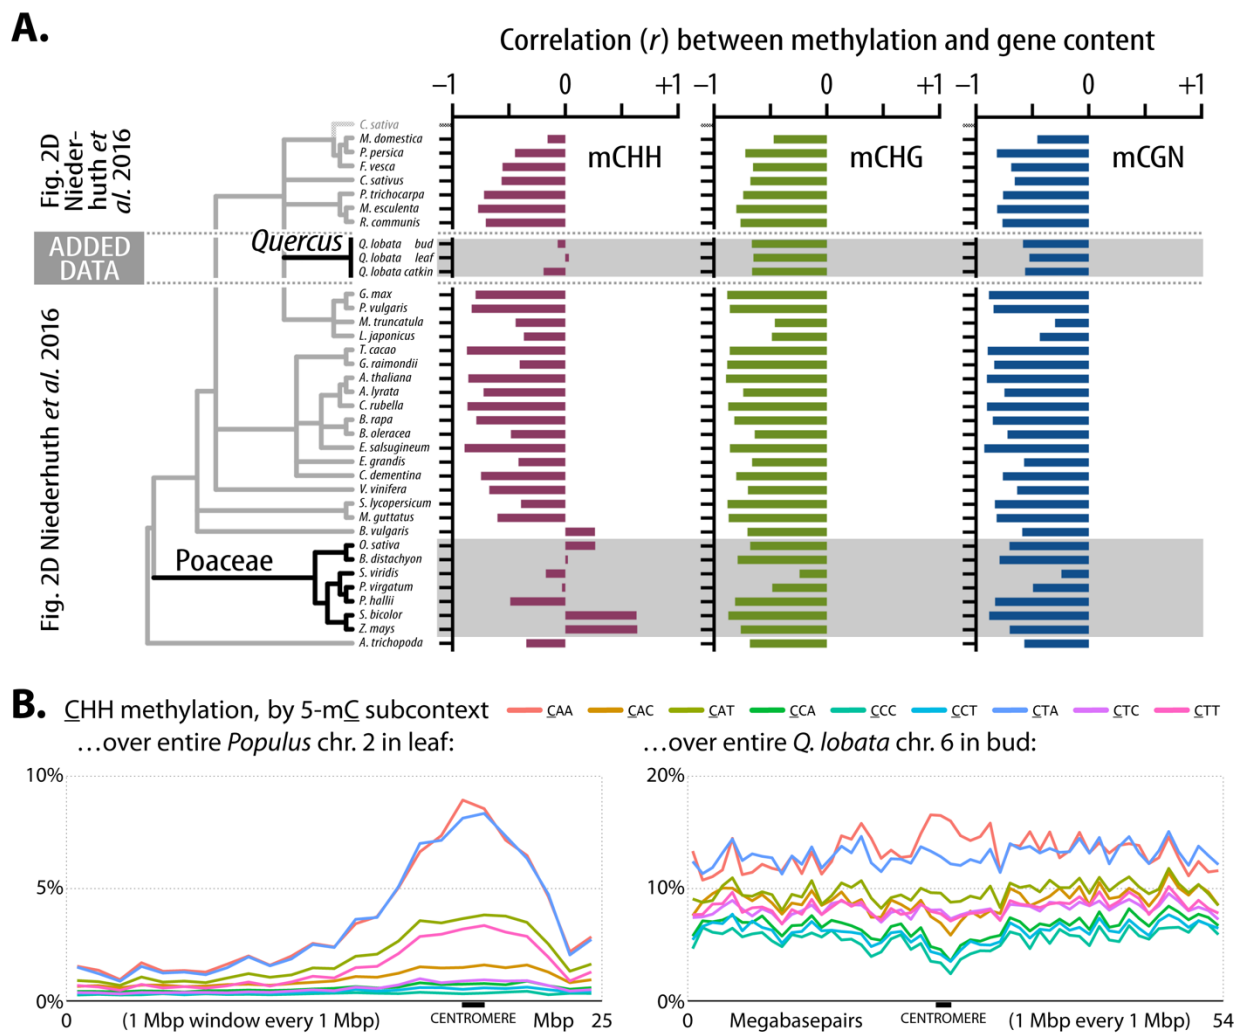

412

413 **Figure 6:** (A) Pearson correlation ( $r$ ) between methylation level and number of genes (100 kbp windows) for mCHH  
 414 (left), mCHG (middle), and mCG (right) context levels from leaf tissue-based Figure 2D of Niederhuth et al.<sup>43</sup>,  
 415 inserting our values for three oak tissues (bud, leaf, and catkin from tree SW786, having matched analysis details  
 416 as closely as possible). (B) Comparison of all nine DNA subcontext methylation levels within the CHH context over  
 417 an illustrative chromosome of *Populus trichocarpa*<sup>46</sup> and *Q. lobata*. (See Figure 5 legend.)

## 418 Discussion

419 Our analysis of a high-contiguity, chromosome-level annotated oak genome reveals previously  
420 unreported features of oaks that might contribute to its ability for adaptation to new  
421 environments and resulting dominance in North American ecosystems. We find surprising  
422 similarities to grasses (Poaceae), another highly successful group of plants. Oaks and grasses  
423 both have genomes with large repeat-rich intergenic regions and share methylation features  
424 that are somewhat unusual, given the current sampling of methylomes in the literature.  
425 Interest has been growing in the adaptive potential provided by large complex intergenic  
426 regions often found in plants with larger genomes<sup>47-49</sup>. For example, a substantially higher  
427 percentage of loci associated with phenotypic variation are found in the large intergenic regions  
428 of maize versus the smaller intergenic regions of *Arabidopsis*<sup>49</sup>. Much of this regulatory  
429 variation has been found in non-TE stably unmethylated DNA<sup>50,51</sup>, such that more than 40% of  
430 phenotypic variation in maize was associated with open chromatin that makes up less than 1%  
431 of the genome<sup>52</sup>. On the other hand, high density of diverse TEs, which has been connected  
432 with local adaptation<sup>53</sup>, can be a source of both transcription factor binding sites and regulatory  
433 non-coding RNAs<sup>54</sup>, and play a role in three-dimensional genome structure<sup>51,55,56</sup>. An  
434 abundance of intergenic heterochromatin-like structure has been demonstrated in grasses<sup>8,57,58</sup>  
435 and, based on patterns suggestive of histone-driven methylation<sup>44,45</sup>, are likely also found in  
436 oaks (Figure 5I, Figures S16, S17, S19 and Auxiliary Spreadsheet 1). Given the dramatic  
437 differences reflected in the chromosome-wide subcontext methylation patterns in the gene-  
438 dense arms of *Arabidopsis* and tomato versus the wider spread of genes in maize and rice<sup>44</sup>,  
439 and similar differences in poplar versus oak (Figure 6B and Figure S20), oaks and grasses may  
440 have some regulatory strategies distinct from those in other angiosperms. Another indicator of  
441 similarity between oaks and grasses is the correlation of CHH methylation levels (mCHH) and  
442 gene count along chromosomes (Figure 6A). A comprehensive characterization within oaks and  
443 across the angiosperms awaits further experimentation and better, more comparable genome  
444 sequences, constructed and annotated with consistent methods.

445 Pronounced mCHH islands are another feature shared between oaks and grasses. In maize,  
446 mCHH islands have been proposed to enforce boundaries between heterochromatin and  
447 euchromatin, and as such contribute to maintaining suppression of TEs during increases in  
448 neighboring gene expression<sup>8,42,59</sup>. Measured as the ratio of peak mCHH to whole genome  
449 average mCHH, we find oaks have unusually strong 5' mCHH islands (Auxiliary Spreadsheet 1),  
450 but it remains to be seen if they also contribute to boundary enforcement. It is possible they  
451 are simply the result of the type of TEs found near gene boundaries. In valley oak (Figure 5),  
452 maize<sup>60</sup>, and *Arabidopsis*<sup>61</sup>, mCHH is influenced by TE family, proximity to genes, and  
453 chromosomal location. The strong enrichment of small, highly methylated TE families near-  
454 genes (Figure 5E and F) could be due to, for example, selection against large TEs in gene  
455 proximal regions.

456 A potentially exciting discovery is the presence of many Pfam DUF247 domains in one of the  
457 largest and densest blocks of tandemly duplicated genes (Figure 4A), as these domains could be  
458 part of a non-self-recognition compatibility system<sup>29</sup>. DUF247 genes have been implicated in a

459 self-recognition system of ryegrass<sup>26,27</sup>, analogous to S-RNase-based self- and non-self-  
460 recognition systems in petunia<sup>30,31</sup>, and tomato, apple, snapdragon, and peach<sup>62</sup>. Oaks have  
461 long been thought to possess some kind of self-incompatibility system because of their high  
462 outcrossing rates, but the single gene SI systems have not fit observations. However, a non-self-  
463 recognition system would be consistent with observed crossing results among self, intra-, and  
464 inter-specific pollinations<sup>63</sup>. Both self- and non-self-recognition systems of co-adapted genes  
465 expressed in pollen and pistil and preventing self-fertilization have evolved independently in  
466 several lineages of angiosperms<sup>29,64</sup>. While the roles of DUF247-containing genes need  
467 experimental verification, their large numbers and high diversity at the amino acid level are  
468 consistent with a non-self-recognition system that could both promote outcrossing while also  
469 permitting occasional self and interspecific crosses.

470 Oaks have a vast reservoir of tandemly duplicated genes of a wide variety of ages (Figure 4F),  
471 contributing to their genetic and phenotypic diversity. As reported for pedunculate oak<sup>6</sup>,  
472 resistance genes are a particularly prominent component of the tandemly duplicated gene  
473 blocks in valley oak, especially the larger (and older) ones (Auxiliary Spreadsheet 2: see  
474 worksheets for tandem pairs >20, 30, 40). The three oak genomes contain hundreds to  
475 thousands of potential R-genes: 732 to 2927 for *Q. lobata*, 632 – 2247 for *Q. robur*, and 793 to  
476 2905 for *Q. suber*. In defending oaks from bacteria, viruses, nematodes, oomycetes, and  
477 insects, these R-genes may both enable the long lifespan of oaks<sup>6</sup>, and also address the puzzle  
478 of how a single or two oak species are able to dominate so many of the ecosystems they  
479 occupy. The classic Janzen–Connell ecological hypothesis proposes that pathogens promote  
480 tropical forest diversity through conspecific negative density-dependent (CNDD) mortality, but  
481 CNDD has been shown across all forest types<sup>65,66</sup>. In oaks, the high number and potential  
482 complexity of R-genes could provide a mechanism to reduce CNDD mortality caused by  
483 pathogens<sup>67</sup>. Moreover, the large effective population size could maintain R-genes, especially if  
484 not costly<sup>68</sup>. In fact, other ecosystem-dominant trees, which also contain large numbers of  
485 domains associated with resistance genes (such as, NB-ARC and LRRs), include the highly  
486 speciose *Eucalyptus* (~600 species) and *Populus* (Table S7). Extensive research demonstrating  
487 the importance of R-gene diversity at both the individual and the population level is ongoing in  
488 *Arabidopsis*, crop species and other plants<sup>69,70</sup>. Studying oaks with large and complex pools of  
489 R-genes will provide an important extension of this work.

490 Inspection of our highly contiguous genome identified numerous syntenic blocks of remnant  
491 genes from the  $\gamma$  triplication event, which occurred  $\approx$ 120 Mya ago when the common ancestor  
492 of angiosperms underwent two whole genome duplication events<sup>38-40</sup>. More than 18% of  
493 protein-coding genes participate in a gene pair directly supporting a self-syntenic block (SSB),  
494 and more than a third of the genome is spanned by a manifest triplication (even without  
495 chaining blocks). SSBs (for example, Figure 4 and Auxiliary Spreadsheet 2) provide an extensive  
496 single genome resource for documenting remnants associated with the  $\gamma$  event. Our annotation  
497 finds triplicate families to be enriched for transcription factors, as well as signal transduction  
498 and housekeeping genes generally (Table S6 and Auxiliary Spreadsheet 2), as has been found in  
499 other studies, e.g., Rensing<sup>71</sup>. These genes, although maintained over millions of years and  
500 highly interconnected<sup>72</sup>, can respond to selective pressures modifying their existing roles. For



501 example, a recent study of silver birch found selective sweeps around candidate genes enriched  
502 among ancient polyploid duplicates that encode developmental timing and physiological cross-  
503 talk functions<sup>7</sup>. In oaks, it would be constructive to learn whether these ancient genes have  
504 undergone positive selection, allowing adaptation to new environments.

505 Genomes of high-quality document the deep evolutionary history of species. The oak genome  
506 has many features that provide hints of possible reasons for their success. Our exploration has  
507 uncovered several surprising similarities to the highly diverse grass genomes that may indicate  
508 analogous or even homologous adaptive strategies that would increase functional diversity in  
509 addition to the diversity generated by extensive gene duplications. Future oak studies may  
510 benefit by looking to the extensive experimental results from both wild and crop grasses for  
511 clues to potential mechanisms contributing to their evolutionary success.

## 512 Methods

513 **Study species, samples, and genomic lab work.** *Quercus lobata* Née (Fagaceae) is a widely-distributed endemic  
514 California oak species found in oak savannas, oak woodlands, and riparian forests. Oak have a highly outcrossed  
515 mating system<sup>73</sup> with the potential for long distance gene flow occurring through wind-dispersed pollen with long-  
516 tailed distributions, despite many near-neighbor pollinations<sup>74,75</sup>. Acorn dispersal is often restricted except for  
517 occasional long-distance colonization by jays<sup>76</sup>. Occupying an unglaciated region of California, contemporary  
518 populations are at least 200k years old with no evidence of severe bottlenecks during cold periods<sup>77,78</sup> like those  
519 described for the European oaks from glaciation that retreated in the last 10k–20k years, allowing rapid  
520 recolonization from refugia in Italy and Spain<sup>79</sup>. Valley oak and other California oak species have been used as a  
521 reliable food source and cultural resource by native peoples of western North America for the last 10k years<sup>80</sup>.  
522 Since the arrival of Europeans, valley oak populations have experienced extensive habitat loss<sup>81</sup>, and current  
523 population recruitment is jeopardized by cattle grazing, rodents, and other factors<sup>82,83</sup>. Moreover, as its climate  
524 niche shifts north and upward<sup>82,84,85</sup>, extant populations are further challenged by climate warming.

525 The focal tree for this study is *Q. lobata* adult SW786, which is located at the UC Santa Barbara Sedgwick Nature  
526 Reserve, is the same individual that was sequenced for version 1.0 of the genome<sup>9</sup>. Leaf samples for the initial  
527 Illumina sequencing (532M paired-end [PE] 250 nt reads with ~500 nt inserts giving 133 Gnt and ~175x coverage,  
528 and 318M mate pair [MP] 150 nt reads from ~3 knt to ~12 knt fragments giving 48 Gnt and ~56x coverage) were  
529 collected in September 2014, as described in Sork, et al.<sup>9</sup>. Additional leaves were collected and DNA extracted in  
530 April 2016 for Pacific Biosciences whole genome SMRTbell libraries (6M reads of mean ~9 knt and N50 ~13 knt  
531 giving 58 Gnt and ~80x coverage), and in March 2017 for Dovetail Chicago Hi-C library preparation. For details of  
532 the 19 whole genome resequencing libraries (Illumina PE, mean ~24x coverage) used for the demographic analysis,  
533 three-tissue (bud, leaf, stem) Pacific Biosciences Iso-Seq and Illumina RNA-Seq transcriptome libraries contributing  
534 to annotation, and three-tissue (bud, catkin, and young leaf) whole-genome bisulfite libraries (Illumina SE, ~18x –  
535 19x coverage) for the DNA methylomes, (see [SI Section I: Sample collection, library preparation, sequencing, and  
536 initial data processing](#)).

537 **Genome assembly.** We constructed the final genome in multiple stages. Stage 1: For the initial “Hybrid Primary”  
538 assembly (818 Mbp in 3.6k scaffolds, with longest 6.7 Mbp and NG50 ~1.2 Mbp assuming at-the-time estimated  
539 730 Mbp for the haploid genome), we applied MaSuRCA 3.2.1<sup>86</sup> to our genomic Illumina PE, Illumina MP, and  
540 PacBio SMRT reads. The assembler identified high heterozygosity and selected diploid settings, allowing it to set  
541 aside most divergent haplotype variants; the result generally contains a single haplotype, but randomly phased, as  
542 we chose the larger scaffold whenever the assembler split two haplotypes into distinct scaffolds. Those scaffolds  
543 filtered out as alternative haplotypes were gathered into the “Hybrid Alternative” additions (466 Mbp in 17k  
544 scaffolds, with longest 1.2 Mbp). Stage 2: To assist completeness, we aligned to Stage 1 Primary+Alternative 82k of  
545 84k transcripts and gene fragments from a prior RNA-Seq-derived transcriptome<sup>87</sup>, with 81k aligning to Primary.

546 To avoid loss of potential coding regions, we moved 317 scaffolds from Alternative to Primary, forming the  
547 “Hybrid-plus-Transcript Primary” assembly (872 Mbp in 4.0k scaffolds, with longest 6.7 Mbp and NG50  $\approx$ 1.2 Mbp),  
548 and “Hybrid-plus-Transcript Alternative” additions (412 Mbp in 16k scaffolds, with longest 0.8 Mbp). Stage 3: We  
549 increased NG50 by aligning Stage 2 Primary scaffold ends with `bwa mem`<sup>88</sup>, merging scaffolds that had unique end  
550 matches of > 94% identity longer than 40 kbp. This created the “Hybrid-plus-Transcript-Merged Primary” assembly  
551 (861 Mbp in 3.2k scaffolds, with longest 10.2 Mbp and NG50  $\approx$ 1.9 Mbp) and “Hybrid-plus-Transcript-Merged  
552 Alternative” additions (16k scaffolds). Stage 4: Next, we generated Hi-C long-range linking information from an  
553 Illumina-sequenced library produced by Dovetail Genomics, which we used to re-scaffold with HiRise<sup>10</sup> after read  
554 alignment with a modified SNAP (<http://snap.cs.berkeley.edu>), dramatically increasing NG50. Scores from the  
555 HiRise learned likelihood model were used to identify and break presumed misjoins, identify prospective joins, and  
556 commit joins above a threshold; shotgun reads from Stage 1 were used to close gaps where possible. Stage 5:  
557 Finally, after HiRise, any redundant haplotype contigs remaining (that truly belong in the same place as the other  
558 haplotype in a scaffolded assembly) are expected to be adjacent to the other haplotype as this is as close as they  
559 can be placed under the linear ordering constraint of HiRise output. We used this property to remove remaining  
560 extra haplotype contigs by aligning adjacent contigs to each other and finding those smaller than their direct  
561 neighbor that had > 50% syntenic alignment with the neighbor, thereby moving 14 Mbp to Alternative and forming  
562 the final “Hi-C-Scaffolded-plus-Neighbor-Cleaned Primary” (“version 3.0”) assembly (Figure 1C). The twelve longest  
563 scaffolds represent near full-length chromosomes (Figures S1 and S2) and total 811 Mbp (96%) of non-gap  
564 sequence.

565 **Comparisons of *Q. lobata* and *Q. robur* assemblies to linkage map.** The *Q. robur* x *Q. petraea* linkage groups  
566 (LGs)<sup>11</sup> are taken from [http://arachne.pierroton.inra.fr/cgi-bin/cmap/map\\_set\\_info?map\\_set\\_acc=51](http://arachne.pierroton.inra.fr/cgi-bin/cmap/map_set_info?map_set_acc=51) using Table  
567 S3 from Lepoittevin, et al.<sup>89</sup> as sequence-defined SNPs, dropping SNPs associated to more than one LG. Genomic  
568 locations were identified with BLASTN+ 2.2.30 ( $E < 10^{-15}$ , word size 8), keeping for each query all alignments with  
569 bitscore  $\geq$  97% of the top bitscore. We plot SNPs that have either a unique surviving alignment, or multiple  
570 alignments but all to the same chromosome and with chromosomal span of hits  $\leq$  2 Mbp wide.

571 **Nucleotide- and amino acid-level alignments and 2-D visualizations of sequence similarity,  $K_s$ , and shared**  
572 **Pfam domains, variously within and between genomes for *Q. lobata*, *Q. robur*, *Q. suber*, *Populus*, *Eucalyptus*,**  
573 ***Theobroma*, and *Coffea*.** Various alignments and visualizations appear in Figures 1E, 4A, and 4B, and at the project  
574 website (TBD) and assisted in *Q. lobata* with discovery and identification of the tandem-like blocks of duplicated  
575 genes and syntenic self-syntenies (SSB). The principal software components were LASTZ for nucleotide alignments  
576 (with masked repeats from RepeatMasker after RepeatModeler); BLASTP, Diamond, and Parasail for homologous  
577 gene pair detection (on respective genome project protein-coding gene models) and subsequent detailed  
578 alignment refinement; C++, Mathematica, and Perl for scripting and pixel generation/import; and ImageMagick  
579 and Adobe Photoshop for manipulation, browsing, and annotation of generally multi-gigapixel images of high  
580 resolution (e.g., 10 kbp/pixel). Pfam hits were determined with InterProScan or direct HMMer runs.  $K_s$  was  
581 computed for all homologous protein pairs discovered with other tools by re-aligning with ‘needle’ from EMBOSS  
582 (<http://emboss.sourceforge.net/>), converting to the level of codons with ‘pal2nal.pl’  
583 (<http://www.bork.embl.de/pal2nal/>), and finally computing  $K_s$  with ‘codeml’ from PAML  
584 (<http://abacus.gene.ucl.ac.uk/software/paml.html>).

585 **Demographic history.** We inferred demographic history using the PSMC’ algorithm<sup>15</sup> by mapping the *Q. lobata* and  
586 *Q. robur* sequencing project genomic shotgun reads to their respective reference assemblies, as well as high-  
587 coverage genomic reads for 19 *Q. lobata* individuals to the *Q. lobata* assembly (Table S1). We called heterozygous  
588 sites in each genome (forming a VCF file with all callable sites) and composed input for PSMC’ with  
589 `vcfAllSiteParser.py` (<https://github.com/stschiff/msmc-tools>). Masking and filters are as described in SI Section IV:  
590 **Demographic analysis** — Input to PSMC’. We ran PSMC’ using default parameters except 200 for maximum number  
591 of iterations. Because PSMC’ inference can be prone to biases, we assessed robustness of our conclusions  
592 (Figure 2B). To determine if inference is affected by re-use of the same reads as used to build the reference  
593 assembly, we analyzed the 19 re-sequenced *Q. lobata* individuals beyond the reference individual SW786. These  
594 showed similar population size changes (Figure 2C light blue) as SW786 (Figure 2C dark blue), suggesting little bias  
595 from re-use. We also assessed if PSMC’ is capable of accurate inference by generating simulated datasets following

596 the inferred demographic history, and re-ran inference on these (Figure 2D). These runs suggested that the only  
597 major issue was the oldest population sizes often being over-estimated. We thus selected ancestral population  
598 sizes matching empirical genome-wide heterozygosities (Figures S8, S9, and S10) and trimmed display in Figure 2C  
599 accordingly (Figure S7 exhibits untrimmed trajectories). Finally, we tested whether PSMC' could reliably infer  
600 changes in population size on timescales relevant to *Quercus*. We simulated 10 test datasets of each run type  
601 under our presented demographic models (in Figure 2C) using the coalescent simulator msprime<sup>90</sup>. With each  
602 simulated genome, we computed heterozygosity and used PSMC' to infer demography; see SI Section IV:  
603 Demographic analysis — Simulations in msprime. We found accurate inference of population sizes over time,  
604 except for the single oldest time step where it tends to be over-estimated (Figure 2D). Note that inferred  
605 demographic trajectories from whole genome-based methods such as PSMC' can be complex but not predict  
606 empirical summary statistics such as the genome-wide distribution of heterozygosity<sup>91</sup>.

607 **Repetitive sequences.** The primary repeat analysis is outlined in Figure 3A, and began with construction of a  
608 *Q. lobata*-specific database of repeat families by RepeatModeler/Classifier open-1.0.8, which was then applied  
609 with RepeatMasker open-4.0.6. Family consensus sequences are not always full length for their class or  
610 irredundant by close sequence similarity; we applied PSI-CD-HIT 4.7 to family consensus sequences at 45%  
611 nucleotide identity (the level where, as the threshold was lowered, intracluster similarities stopped falling in  
612 frequency and began rising) and chose a canonical rotation and strand for tandem repeat units, so as to cluster  
613 families into repeat “superfamilies” (SFs). Generally, each SF was assigned the RepeatClassifier class of the longest  
614 member of the family that was not unknown (if any; approximately two-thirds of SF-covered base pairs were  
615 classifiable). Annotated intervals for a SF are the nucleotide-level union of all intervals for member families, and  
616 SFs were assigned “s1RF#####” accessions roughly serialized by descending mass. For certain uses (e.g., gene  
617 annotation), we also applied structurally-aware LTRharvest and LTRdigest from GenomeTools 1.5.9 to specifically  
618 target the abundant LTR TEs, identifying 28k instances of total mass 184 Mbp (not much larger than the 179 Mbp  
619 in LTR-classified SFs). Further details are in SI Section V: Repetitive sequences.

620 **Annotation of protein-coding genes.** Figure 7A outlines dataflow of the PCG modeling process employed. **Pure Iso-**  
621 **Seq models.** The Pacific Biosciences of California, Inc. (PacBio) pipeline generated 197k–223k nominally full length  
622 non-chimeric polished transcripts (“reads”) from the poly-A-selected strand-specific bud, leaf, and stem PacBio-  
623 sequenced Iso-Seq libraries. Pooling tissues, Minimap2 aligned each read to zero to five reference genome  
624 locations (96%–99% uniquely); 11% of alignments were filtered out based on empirical criteria. Preliminary exon-  
625 intron structure was obtained by focusing on the reference side of each alignment, ignoring short insertions and  
626 merging short deletions and gapless blocks. Inspection found compact and well-isolated gene loci with generally  
627 concordant pileups at each of the 24k tentative loci, which had highly variable coverage (1 to 14k reads each; 56%  
628  $\geq 5$ , 22% =1). Inspection of higher-coverage loci found reads within pileups to vary: (i) at the exact coordinate level  
629 (with exon–intron boundaries moved by typically < 10 nt vs. common); (ii) at the structural level (introns resized or  
630 deleted or inserted, generally in a small minority of reads, and at more loci and in more ways than likely by  
631 alternative splicing); and (iii) in extent (with some reads truncated, especially at the 5' end, with loss of multiple  
632 exons possible). A consensus exon–intron model per locus was generated by resolving (i) via rounding boundaries  
633 within  $\pm 25$  nt to a most common boundary; (ii) by generally keeping exons and introns only in at least half of reads;  
634 and (iii) by extending 5' and 3' ends to the furthest extent observed. CDS assignments were made considering  
635 three methods: (i) longest ORFs; (ii) filtered (including restriction to only near-best hits per locus) BLASTP-  
636 equivalent (Diamond 0.9.22.123) alignments ( $E < 0.001$ ) of translations of all ORFs to the entire NCBI 2018-05-18  
637 ‘nr’ database (22k consensuses had at least one hit, with 83% of top hits involving at least half of both the  
638 translated ORF and the NCBI sequence, and with 99% having  $\geq 50\%$  amino acid identity, and 90% having  $E < 10^{-35}$ ;  
639 assignment of an ORF required agreement among all surviving hits); and (iii) a  $\log_2$ -odds bicodon coding potential  
640 trained using a selected subset of the NCBI analysis. Partial (and six-frame) ORFs were permitted. A consensus was  
641 assigned CDS (i.e., an ORF) if (ii) identified an ORF, the longest member of (i) was of the same frame with non-  
642 empty intersection with that ORF, and (iii) was also of the same frame and with non-empty intersection. This  
643 attributed CDS (and, hence, UTR5 and UTR3) to 19k loci, with 95% on the consensus read strand and 85% having  $\geq$   
644 50 nt of both UTR5 and UTR3. Hand inspection of a random subset found them to be of generally good quality  
645 (often needing no edits). Diverse AUGUSTUS hints were constructed from the Iso-Seq reads and pure Iso-Seq  
646 models for eventual use in the final AUGUSTUS run near the end of the PCG modeling process.

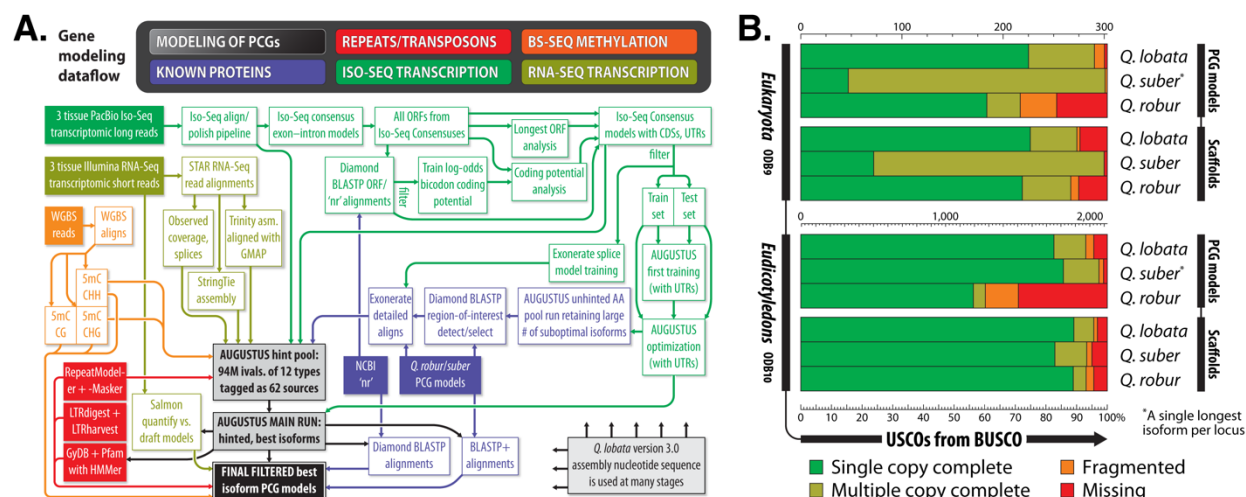

647

648 **Figure 7: (A)** Dataflow of protein-coding gene (PCG) modeling. **(B)** BUSCO v3 analysis of PCG models and genomic  
649 scaffolds for *Q. lobata*, *Q. robur*, and *Q. suber* against the ODB9 Eukaryota and ODB10 Eudicotyledons USCO sets.

650 **AUGUSTUS bootstrap.** The 19k pure Iso-Seq models were filtered to a very high confidence subset of 2,639, then  
651 thinned to 2,558 by choosing single representatives from homology clusters determined via Exonerate 2.4.0  
652 affine:local protein alignments. These were split uniformly at random into 1,698-model training and 860-model  
653 test sets and used to bootstrap AUGUSTUS via “new\_species.pl” (enabling UTRs) and “etraining”, then optimized  
654 with “optimize\_augustus.pl”, and also used to train the splice model of Exonerate. **RNA-Seq.** Paired end 101+101  
655 nt Illumina HiSeq 4000 RNA-Seq reads were also collected from rRNA-depleted strand-specific bud, leaf, and stem  
656 libraries. The 121M to 153M pairs per tissue were aligned with STAR 2.5.3a and assembled into nominal transcripts  
657 with reference guidance by StringTie 1.3.4d and Trinity 2.6.6; Trinity output was aligned back to the reference  
658 genome with GMAP 2017-11-15. A large collection of diverse AUGUSTUS hints were constructed from STAR  
659 observed genomic base pair coverage and empirical splices, StringTie reference-quoted transcripts, and GMAP  
660 alignments. **Known proteins.** Protein translations of the *Q. robur* and *Q. suber* PCG models were BLASTP-  
661 equivalent (Diamond) aligned to a temporary trained/optimized but unhinted AUGUSTUS run generating and  
662 retaining a very large number of suboptimal isoform models. The resultant hits were used to identify regions of  
663 interest on the *Q. lobata* reference genome, that were then aligned vs. *Q. robur* and *Q. suber* in splice-discovery  
664 detail with splice model-trained Exonerate. Numerous strong AUGUSTUS hints were then constructed from  
665 Exonerate’s alignments. **Repeats.** Reference genome base pairs masked by RepeatMasker from the species-  
666 specific database constructed by RepeatModeler were weakly hinted to AUGUSTUS as non-exonic. **DNA mCHG and**  
667 **mCHH (BS-Seq) patterns.** Similar to repeats, sufficiently high mCHG or mCHH levels from merging the three tissues  
668 of the DNA methylation analyses were weakly hinted to AUGUSTUS as non-exonic. (Both *a priori* expectation and  
669 empirical examination of preliminary AUGUSTUS runs without methylation-based hinting had these marks as very  
670 highly anti-correlated with PCGs. mCG was not used, as it is complex, being high both in repeats and in many PCGs  
671 due to gene body methylation of non-short genes.)

672 **Main AUGUSTUS run:** The above data sources provided 94M hinting intervals of 12 types tagged as from 62  
673 sources. (As AUGUSTUS scores cannot be configured to be continuous functions of hint evidence strength [e.g.,  
674 numeric coverage level from RNA-Seq], continuous strengths were generally broken into small numbers of discrete  
675 bins, with fixed scoring per bin.) A three-line patch (in extrinsicinfo.cc) to the AUGUSTUS C++ source code was  
676 required to enlarge hard-coded limits. One top isoform model per locus was predicted by the trained, optimized,  
677 UTR-aware, and now hinted main AUGUSTUS run. **Filtered final PCG models.** Numerous models from the main  
678 AUGUSTUS run were, e.g., clearly transposons with no or little evidence of observed expression. Based on several  
679 indicators (including Salmon-quantified per-model RNA-Seq expression, overlap with annotated repeats, presence  
680 of LTRdigest/harvest or GyDB/HMMer transposon domains, average mCG and mCHG and mCHH levels, and



681 Diamond and BLASTP+ alignments with NCBI 'nr' and *Q. suber* and *Q. robur* PCGs), we removed such and other  
682 hypothetical models with poor evidence.

683 **Enrichment analyses.** Benjamini-Hochberg false discovery rate (FDR)-adjusted hypergeometric *p*-values were used  
684 to determine Pfam domain enrichment in targeted subsets of tandemly duplicated genes and genes within SSBs.

685 **Methylomes and analysis of tissue-specific methylation patterns.** Sample collection, library preparation,  
686 sequencing, and initial methylation calling are described in [SI Section VII: Methylomes and analysis of methylation](#)  
687 [patterns](#). Libraries were prepared using the TruSeq Nano DNA (Illumina) and Epitex kits (Qiagen), and sequenced  
688 as 100 nt single end reads on an Illumina HiSeq 4000 to median coverage 18–19-fold. Methylation levels were  
689 determined using Methylypy v1.4.6<sup>92</sup>. DeepTools v3.1.2<sup>93</sup> computeMatrix and plotProfile were used to assess  
690 methylation levels with respect to gene models and repeat superfamilies ([Figures 5A–F](#), [Figure 5I](#), [Figures S15 and](#)  
691 [S17](#), with default parameters except as described in the legend). Methylation levels for 100 bp windows were  
692 calculated by dividing the total number of reads calling 'T' (= methylated) by the total number of informative reads  
693 ('C' or 'T') for all genomic cytosine positions in the appropriate sequence context within the window. Genome wide  
694 average methylation levels ([Figure 5](#) and [Figure S14](#)) were calculated by averaging 100 bp window levels for the  
695 twelve chromosomal scaffolds. Per-site methylation levels in [Figure S14](#) were calculated by dividing reads showing  
696 methylation ('T') by all informative reads ('C' or 'T') for each position, plotting with R ggplot2 v3.3.2<sup>94</sup>. Designation  
697 of genomic regions with respect to genes (1 kbp up, 5' UTR, etc.) was done with Bedtools v2.27.1 (BEDTools: a  
698 flexible suite of utilities for comparing genomic features <https://doi.org/10.1093/bioinformatics/btq033>) and  
699 bed12toAnnotation.awk (<https://github.com/guigolab/geneid/blob/master/scripts/bed12toAnnotation.awk>). PCG  
700 model spans do not overlap in our annotation; however, overlaps for 1 kbp upstream and 1 kbp downstream  
701 regions were removed from the 1k up and 1k down categories, including overlaps that spanned neighboring genes.  
702 Gene regions overlapping with intervals (200 kbp to 3 Mbp) covering peri-centromere regions were removed.  
703 Introns were separated into first intron vs. other introns. Chromosome scale plots of subcontext methylation  
704 ([Figure 5I](#) and [Figure 6A](#)) were calculated with Bedtools as the mean of the percent methylation at each genomic  
705 cytosine position in the appropriate sequence context within each 1 Mb window, every 1 Mb. *Populus* methylation  
706 data<sup>46</sup> was for Tree 13 branch 1, from GEO (<https://www.ncbi.nlm.nih.gov/geo/query/acc.cgi?acc=GSE132939>  
707 2020). Local correlations between methylation levels and gene count were determined using methods from  
708 Niederhuth, et al.<sup>43</sup> to maximize relevance of the comparison. Thus, using Bedtools, the genome was divided into  
709 100 kbp windows with 50 kbp overlaps. Methylation for each 100 kbp window was from averaging 100 bp window  
710 methylation levels (as above). Genes per window were counted with Bedtools intersect, requiring at least 50% of  
711 the gene span to be inside the window. Correlation between gene count and methylation level was calculated with  
712 R cor()'s Pearson method with incomplete observations dropped.

### 713 Data availability

714 Data are available at NCBI (GCA\_001633185.3, additional accessions TBD), European Variation Archive  
715 (accession TBD), the project website ([valleyoak.ucla.edu](http://valleyoak.ucla.edu)), and the project genome browser  
716 ([genomes.mcdb.ucla.edu/cgi-bin/hgTracks?dg=queLob3](http://genomes.mcdb.ucla.edu/cgi-bin/hgTracks?dg=queLob3)).

### 717 References

- 718 1 Kremer, A. & Hipp, A. L. Oaks: an evolutionary success story. *New Phytologist* **226**, 987-1011 (2020).
- 719 2 Hipp, A. L., Manos, P. S. & Cavender-Bares, J. How oak trees evolved to rule the forests of the Northern  
720 Hemisphere. *Scientific American* **323**, 42-49, doi:10.1038/scientificamerican0820-42 (2020).
- 721 3 Barrón, E. et al. in *Oaks Physiological Ecology. Exploring the Functional Diversity of Genus Quercus L.* (ed  
722 Peguero-Pina J. Gil-Pelegrín E., Sancho-Knapik, D.) 39-105 (Springer, 2017).
- 723 4 Denk, T., Grimm, G. W., Manos, P. S., Deng, M. & Hipp, A. L. in *Oaks Physiological Ecology. Exploring the*  
724 *Functional Diversity of Genus Quercus L.* Vol. 7 *Tree Physiology* (eds E. Gil-Pelegrín, J. Peguero-Pina, & D.  
725 Sancho-Knapik) (Springer, 2017).
- 726 5 Cavender-Bares, J. Diversity, distribution, and ecosystem services of the North American oaks. *Journal of*  
727 *International Oak Society* **27**, 37-48 (2016).



- 728 6 Plomion, C. *et al.* Oak genome reveals facets of long lifespan. *Nature Plants* **4**, 440-452, doi:10.1038/s41477-  
729 018-0172-3 (2018).
- 730 7 Salojärvi, J. *et al.* Genome sequencing and population genomic analyses provide insights into the adaptive  
731 landscape of silver birch. *Nature Genetics* **49**, 904-912, doi:10.1038/ng.3862 (2017).
- 732 8 Li, Q. *et al.* RNA-directed DNA methylation enforces boundaries between heterochromatin and euchromatin  
733 in the maize genome. *Proceedings of the National Academy of Sciences*, 201514680,  
734 doi:10.1073/pnas.1514680112 (2015).
- 735 9 Sork, V. L. *et al.* First draft assembly and annotation of the genome of a California endemic oak. *Quercus*  
736 *lobata* Née (Fagaceae). *G3: Genes | Genomes | Genetics* **11**, 3485-3495 (2016).
- 737 10 Putnam, N. H. *et al.* Chromosome-scale shotgun assembly using an in vitro method for long-range linkage.  
738 *Genome Research* **26**, 342-350, doi:10.1101/gr.193474.115 (2016).
- 739 11 Bodénès, C., Chancerel, E., Ehrenmann, F., Kremer, A. & Plomion, C. High-density linkage mapping and  
740 distribution of segregation distortion regions in the oak genome. *DNA Research* **23**, 115-124,  
741 doi:10.1093/dnares/dsw001 (2016).
- 742 12 Ramos, A. M. *et al.* The draft genome sequence of cork oak. *Scientific Data* **5**, 180069,  
743 doi:10.1038/sdata.2018.69 (2018).
- 744 13 Hipp, A. L. *et al.* Genomic landscape of the global oak phylogeny. *New Phytologist* **226**, 1198-1212 (2020).
- 745 14 Tuskan, G. A. *et al.* The genome of black cottonwood, *Populus trichocarpa* (Torr. & Gray). *Science* **313**,  
746 1596-1604, doi:10.1126/science.1128691 (2006).
- 747 15 Schiffels, S. & Durbin, R. Inferring human population size and separation history from multiple genome  
748 sequences. *Nature Genetics* **46**, 919-925, doi:10.1038/ng.3015 (2014).
- 749 16 Rundel, P. W. *et al.* Mediterranean Biomes: Evolution of Their Vegetation, Floras, and Climate. *Annual Review*  
750 *of Ecology, Evolution, and Systematics* **47**, 383-407, doi:10.1146/annurev-ecolsys-121415-032330 (2016).
- 751 17 Corbett-Detig, R. B., Hartl, D. L. & Sackton, T. B. Natural selection constrains neutral diversity across a wide  
752 range of species. *PLOS Biology* **13**, e1002112, doi:10.1371/journal.pbio.1002112 (2015).
- 753 18 Myburg, A. A. *et al.* The genome of *Eucalyptus grandis*. *Nature* **510**, 356-362, doi:10.1038/nature13308  
754 (2014).
- 755 19 Argout, X. *et al.* The genome of *Theobroma cacao*. *Nature Genetics* **43**, 101-108, doi:10.1038/ng.736 (2011).
- 756 20 Denoeud, F. *et al.* The coffee genome provides insight into the convergent evolution of caffeine biosynthesis.  
757 *Science* **345**, 1181-1184, doi:10.1126/science.1255274 (2014).
- 758 21 Griffin, J. R. & Critchfield, W. B. *The distribution of the forest trees in California*. (Pacific SW Forest and Range  
759 Experiment Station, U.S. Department of Agriculture Forest Service, 1972).
- 760 22 Stanke, M., Schöffmann, O., Morgenstern, B. & Waack, S. Gene prediction in eukaryotes with a generalized  
761 hidden Markov model that uses hints from external sources. *BMC Bioinformatics* **7**, 62, doi:10.1186/1471-  
762 2105-7-62 (2006).
- 763 23 El-Gebali, S. *et al.* The Pfam protein families database in 2019. *Nucleic Acids Research* **47**, D427-D432,  
764 doi:10.1093/nar/gky995 (2018).
- 765 24 Seppey, M., Manni, M. & Zdobnov, E. M. in *Gene Prediction. Methods in Molecular Biology* Vol. 1962 (ed M.  
766 Kollmar) ( Humana, 2019).
- 767 25 Gururani, M. A. *et al.* Plant disease resistance genes: current status and future directions. *Physiological and*  
768 *molecular plant pathology* **78**, 51-65 (2012).
- 769 26 Manzanares, C. *et al.* A gene encoding a DUF247 domain protein cosegregates with the S Self-Incompatibility  
770 locus in perennial ryegrass. *Molecular Biology and Evolution* **33**, 870-884, doi:10.1093/molbev/msv335  
771 (2015).
- 772 27 Thorogood, D. *et al.* A novel multivariate approach to phenotyping and association mapping of multi-locus  
773 gametophytic self-incompatibility reveals s, z, and other loci in a perennial ryegrass (Poaceae) population.  
774 *Frontiers in Plant Science* **8**, doi:10.3389/fpls.2017.01331 (2017).
- 775 28 Fujii, S., Kubo, K.-i. & Takayama, S. Non-self- and self-recognition models in plant self-incompatibility. *Nature*  
776 *Plants* **2**, 16130, doi:10.1038/nplants.2016.130 (2016).
- 777 29 Iwano, M. & Takayama, S. Self/non-self discrimination in angiosperm self-incompatibility. *Curr. Opin. Plant*  
778 *Biol.* **15**, 78-83, doi:<https://doi.org/10.1016/j.pbi.2011.09.003> (2012).
- 779 30 Kubo, K.-i. *et al.* Gene duplication and genetic exchange drive the evolution of S-RNase-based self-  
780 incompatibility in *Petunia*. *Nature Plants* **1**, 14005, doi:10.1038/nplants.2014.5 (2015).

- 781 31 Li, W. & Chetelat, R. T. A pollen factor linking inter- and intraspecific pollen rejection in tomato. *Science* **330**,  
782 1827-1830, doi:10.1126/science.1197908 (2010).
- 783 32 De Franceschi, P., Dondini, L. & Sanzol, J. Molecular bases and evolutionary dynamics of self-incompatibility in  
784 the Pyrinae (Rosaceae). *Journal of Experimental Botany* **63**, 4015-4032, doi:10.1093/jxb/ers108 (2012).
- 785 33 Li, M. *et al.* Genome structure and evolution of *Antirrhinum majus* L. *Nature Plants* **5**, 174-183,  
786 doi:10.1038/s41477-018-0349-9 (2019).
- 787 34 Aguiar, B. *et al.* Convergent evolution at the gametophytic self-incompatibility system in *Malus* and *Prunus*.  
788 *PLOS ONE* **10**, e0126138, doi:10.1371/journal.pone.0126138 (2015).
- 789 35 Zhang, Z. *et al.* A PECTIN METHYLESTERASE gene at the maize Ga1 locus confers male function in unilateral  
790 cross-incompatibility. *Nature Communications* **9**, 3678, doi:10.1038/s41467-018-06139-8 (2018).
- 791 36 Chen, M. *et al.* EbARC1, an E3 ubiquitin ligase gene in *Erigeron breviscapus*, confers self-incompatibility in  
792 transgenic *Arabidopsis thaliana*. *International Journal of Molecular Sciences* **21**, 1458 (2020).
- 793 37 Mistry, J. *et al.* Pfam: The protein families database in 2021. *Nucleic Acids Research* **49**, D412-D419,  
794 doi:10.1093/nar/gkaa913 (2020).
- 795 38 Chanderbali, A. S., Berger, B. A., Howarth, D. G., Soltis, D. E. & Soltis, P. S. Evolution of floral diversity:  
796 genomics, genes and gamma. *Philosophical Transactions of the Royal Society B-Biological Sciences* **372**,  
797 doi:10.1098/rstb.2015.0509 (2017).
- 798 39 Jiao, Y. N. *et al.* A genome triplication associated with early diversification of the core eudicots. *Genome*  
799 *Biology* **13**, doi:10.1186/gb-2012-13-1-r3 (2012).
- 800 40 Vekemans, D. *et al.* Gamma paleohexaploidy in the stem lineage of core eudicots: significance for MADS-Box  
801 gene and species diversification. *Molecular Biology and Evolution* **29**, 3793-3806,  
802 doi:10.1093/molbev/mss183 (2012).
- 803 41 Higo, A. *et al.* DNA methylation is reconfigured at the onset of reproduction in rice shoot apical meristem.  
804 *Nature communications* **11**, 4079-4079, doi:10.1038/s41467-020-17963-2 (2020).
- 805 42 Gent, J. I. *et al.* CHH islands: de novo DNA methylation in near-gene chromatin regulation in maize. *Genome*  
806 *Research* **23**, 628-637, doi:10.1101/gr.146985.112 (2013).
- 807 43 Niederhuth, C. E. *et al.* Widespread natural variation of DNA methylation within angiosperms. *Genome*  
808 *biology* **17**, 194 (2016).
- 809 44 Gouil, Q. & Baulcombe, D. C. DNA methylation signatures of the plant chromomethyltransferases. *PLOS*  
810 *Genetics* **12**, e1006526, doi:10.1371/journal.pgen.1006526 (2016).
- 811 45 Song, X. & Cao, X. Context and complexity: Analyzing methylation in trinucleotide sequences. *Trends in Plant*  
812 *Science* **22**, 351-353, doi:<https://doi.org/10.1016/j.tplants.2017.03.013> (2017).
- 813 46 Hofmeister, B. T. *et al.* A genome assembly and the somatic genetic and epigenetic mutation rate in a wild  
814 long-lived perennial *Populus trichocarpa*. *Genome Biology* **21**, 259, doi:10.1186/s13059-020-02162-5 (2020).
- 815 47 Carpentier, M.-C. *et al.* Retrotranspositional landscape of Asian rice revealed by 3000 genomes. *Nature*  
816 *Communications* **10**, 24, doi:10.1038/s41467-018-07974-5 (2019).
- 817 48 Choi, J. Y. & Lee, Y. C. G. Double-edged sword: The evolutionary consequences of the epigenetic silencing of  
818 transposable elements. *PLOS Genetics* **16**, e1008872, doi:10.1371/journal.pgen.1008872 (2020).
- 819 49 Mei, W., Stetter, M. G., Gates, D. J., Stitzer, M. C. & Ross-Ibarra, J. Adaptation in plant genomes: Bigger is  
820 different. *Am J Bot* **105**, 16-19, doi:<https://doi.org/10.1002/ajb2.1002> (2018).
- 821 50 Crisp, P. A. *et al.* Stable unmethylated DNA demarcates expressed genes and their cis-regulatory space in  
822 plant genomes. *Proceedings of the National Academy of Sciences of the United States of America* **117**, 23991-  
823 24000, doi:10.1073/pnas.2010250117 (2020).
- 824 51 Ricci, W. A. *et al.* Widespread long-range cis-regulatory elements in the maize genome. *Nature Plants* **5**, 1237-  
825 1249, doi:10.1038/s41477-019-0547-0 (2019).
- 826 52 Rodgers-Melnick, E., Vera, D. L., Bass, H. W. & Buckler, E. S. Open chromatin reveals the functional maize  
827 genome. *Proceedings of the National Academy of Sciences*, 201525244, doi:10.1073/pnas.1525244113  
828 (2016).
- 829 53 Baduel, P., Quadrana, L., Hunter, B., Bomblies, K. & Colot, V. Relaxed purifying selection in autopolyploids  
830 drives transposable element over-accumulation which provides variants for local adaptation. *Nature*  
831 *Communications* **10**, 5818, doi:10.1038/s41467-019-13730-0 (2019).
- 832 54 Chuong, E. B., Elde, N. C. & Feschotte, C. Regulatory activities of transposable elements: from conflicts to  
833 benefits. *Nature Reviews Genetics* **18**, 71-86, doi:10.1038/nrg.2016.139 (2017).

- 834 55 Li, E. *et al.* Long-range interactions between proximal and distal regulatory regions in maize. *Nature*  
835 *Communications* **10**, 2633, doi:10.1038/s41467-019-10603-4 (2019).
- 836 56 Vanrobays, E., Thomas, M., Tatout, C. in *Annual Plant Reviews online* (ed J.A. Roberts) 157-190 (2017).
- 837 57 Makarevitch, I. *et al.* Genomic distribution of maize facultative heterochromatin marked by trimethylation of  
838 H3K27. *The Plant Cell* **25**, 780-793, doi:10.1105/tpc.112.106427 (2013).
- 839 58 Zhao, L. *et al.* Chromatin loops associated with active genes and heterochromatin shape rice genome  
840 architecture for transcriptional regulation. *Nature Communications* **10**, 3640, doi:10.1038/s41467-019-11535-  
841 9 (2019).
- 842 59 Long, J. C. *et al.* Decrease in DNA methylation 1 (DDM1) is required for the formation of mCHH islands in  
843 maize. *Journal of Integrative Plant Biology* **61**, 749-764, doi:<https://doi.org/10.1111/jipb.12733> (2019).
- 844 60 Achour, Z. *et al.* Low temperature triggers genome-wide hypermethylation of transposable elements and  
845 centromeres in maize. *bioRxiv*, 573915, doi:10.1101/573915 (2019).
- 846 61 Sasaki, E., Kawakatsu, T., Ecker, J. R. & Nordborg, M. Common alleles of CMT2 and NRPE1 are major  
847 determinants of CHH methylation variation in *Arabidopsis thaliana*. *PLOS Genetics* **15**, e1008492,  
848 doi:10.1371/journal.pgen.1008492 (2020).
- 849 62 Kear, P. J. & McClure, B. in *Adv Exp Med Biol* (ed Carlos López-Larrea) 108-123 (Springer US, 2012).
- 850 63 Boavida, L. C., Silva, J. P. & Feijo, J. A. Sexual reproduction in the cork oak (*Quercus sober* L.) - II. Crossing  
851 intra- and interspecific barriers. *Sex. Plant Reprod.* **14**, 143-152, doi:10.1007/s004970100100 (2001).
- 852 64 Charlesworth, D., Vekemans, X., Castric, V. & Glémin, S. Plant self-incompatibility systems: a molecular  
853 evolutionary perspective. *New Phytologist* **168**, 61-69, doi:<https://doi.org/10.1111/j.1469-8137.2005.01443.x>  
854 (2005).
- 855 65 Johnson, D. J., Beaulieu, W. T., Bever, J. D. & Clay, K. Conspecific negative density dependence and forest  
856 diversity. *Science* **336**, 904-907, doi:10.1126/science.1220269 (2012).
- 857 66 Bever, J. D., Mangan, S. A. & Alexander, H. M. Maintenance of plant species diversity by pathogens. *Annual*  
858 *Review of Ecology, Evolution, and Systematics* **46**, 305-325, doi:10.1146/annurev-ecolsys-112414-054306  
859 (2015).
- 860 67 Marden, J. H. *et al.* Ecological genomics of tropical trees: how local population size and allelic diversity of  
861 resistance genes relate to immune responses, cosusceptibility to pathogens, and negative density  
862 dependence. *Molecular Ecology* **26**, 2498-2513, doi:<https://doi.org/10.1111/mec.13999> (2017).
- 863 68 Stump, S. M., Marden, J. H., Beckman, N. G., Mangan, S. A. & Comita, L. S. Resistance genes affect how  
864 pathogens maintain plant abundance and diversity. *The American Naturalist* **196**, 472-486,  
865 doi:10.1086/710486 (2020).
- 866 69 Xue, J.-Y., Takken, F. L. W., Nepal, M. P., Maekawa, T. & Shao, Z.-Q. Editorial: Evolution and Functional  
867 Mechanisms of Plant Disease Resistance. *Frontiers in Genetics* **11**, doi:10.3389/fgene.2020.593240 (2020).
- 868 70 Karasov, T. L., Shirsekar, G., Schwab, R. & Weigel, D. What natural variation can teach us about resistance  
869 durability. *Curr. Opin. Plant Biol.* **56**, 89-98, doi:<https://doi.org/10.1016/j.pbi.2020.04.010> (2020).
- 870 71 Rensing, S. A. Gene duplication as a driver of plant morphogenetic evolution. *Curr. Opin. Plant Biol.* **17**, 43-48,  
871 doi:10.1016/j.pbi.2013.11.002 (2014).
- 872 72 Defoort, J., Van de Peer, Y. & Carretero-Paulet, L. The evolution of gene duplicates in angiosperms and the  
873 impact of protein-protein interactions and the mechanism of duplication. *Genome Biology and Evolution* **11**,  
874 2292-2305, doi:10.1093/gbe/evz156 (2019).
- 875 73 Sork, V., Dyer, R., Davis, F. & Smouse, P. in *Proceedings of the Fifth Symposium on Oak Woodlands: Oaks in*  
876 *California's Changing Landscape. 2001 October 22-25; San Diego, CA. Gen. Tech. Rep. PSW-GTR-184.* (ed R.B.  
877 McCreary Standiford, D; Purcell, K.L.) 427-444 (Pacific Southwest Research Station, Forest Service, U.S.  
878 Department of Agriculture; , 2002).
- 879 74 Pluess, A. R. *et al.* Short distance pollen movement in a wind-pollinated tree, *Quercus lobata* (Fagaceae).  
880 *Forest Ecology and Management* **258**, 735-744, doi:10.1016/j.foreco.2009.05.014 (2009).
- 881 75 Sork, V. L. & Smouse, P. E. Genetic analysis of landscape connectivity in tree populations. *Landscape Ecology*  
882 **21**, 821-836 (2006).
- 883 76 Sork, V. L., Smouse, P. E., Grivet, D. & Scofield, D. G. Impact of asymmetric male and female gamete dispersal  
884 on allelic diversity and spatial genetic structure in valley oak (*Quercus lobata* Née). *Evolutionary ecology* **29**,  
885 927-945 (2015).

- 886 77 Grivet, D., Deguilloux, M.-F., Petit, R. J. & Sork, V. L. Contrasting patterns of historical colonization in white  
887 oaks (*Quercus* spp.) in California and Europe. *Molecular Ecology* **15**, 4085-4093 (2006).
- 888 78 Gugger, P. F., Ikegami, M. & Sork, V. L. Influence of late Quaternary climate change on present patterns of  
889 genetic variation in valley oak, *Quercus lobata* Née. *Molecular Ecology* **22**, 3598-3612,  
890 doi:10.1111/mec.12317 (2013).
- 891 79 Petit, R. J. *et al.* Chloroplast DNA footprints of postglacial recolonization by oaks. *Proceedings of the National  
892 Academy of Sciences of the United States of America* **94**, 9996-10001 (1997).
- 893 80 Anderson, M. K. *Tending the Wild: Native American Knowledge and the Management of California's Natural  
894 Resources*. 555 (University of California Press, 2005).
- 895 81 Whipple, A. A., Grossinger, R. M. & Davis, F. W. Shifting baselines in a California oak savanna: Nineteenth  
896 century data to inform restoration scenarios. *Restoration Ecology* **19**, 88-101, doi:10.1111/j.1526-  
897 100X.2009.00633.x (2011).
- 898 82 McLaughlin, B. C. & Zavaleta, E. S. Predicting species responses to climate change: demography and climate  
899 microrefugia in California valley oak (*Quercus lobata*). *Global Change Biology* **18**, 2301-2312,  
900 doi:10.1111/J.1365-2486.2011.02630.X (2012).
- 901 83 Tyler, C. M., Kuhn, B. & Davis, F. W. Demography and recruitment limitations of three oak species in  
902 California. *Quarterly Review of Biology* **81**, 127-152 (2006).
- 903 84 Sork, V. L. *et al.* Gene movement and genetic association with regional climate gradients in California valley  
904 oak (*Quercus lobata* Née) in the face of climate change. *Molecular Ecology* **19**, 3806-3823,  
905 doi:10.1111/j.1365-294X.2010.04726.x (2010).
- 906 85 Kueppers, L. N., Snyder, M. A., Sloan, L. C., Zavaleta, E. S. & Fulfrost, B. Modeled regional climate change and  
907 California endemic oak ranges. *Proceedings of the National Academy of Sciences of the United States of  
908 America* **102**, 16281-16286 (2005).
- 909 86 Zimin, A. V. *et al.* Hybrid assembly of the large and highly repetitive genome of *Aegilops tauschii*, a progenitor  
910 of bread wheat, with the MaSuRCA mega-reads algorithm. *Genome Research* **27**, 787-792,  
911 doi:10.1101/gr.213405.116 (2017).
- 912 87 Cokus, S. J., Gugger, P. F. & Sork, V. L. Evolutionary insights from *de novo* transcriptome assembly and SNP  
913 discovery in California white oaks. *BMC Genomics* **16**, 552 (2015).
- 914 88 Li, H. & Durbin, R. Fast and accurate short read alignment with Burrows-Wheeler transform. *Bioinformatics*  
915 **25**, 1754-1760, doi:10.1093/bioinformatics/btp324 (2009).
- 916 89 Lepoittevin, C. *et al.* Single-nucleotide polymorphism discovery and validation in high-density SNP array for  
917 genetic analysis in European white oaks. *Molecular Ecology Resources* **15**, 1446-1459, doi:10.1111/1755-  
918 0998.12407 (2015).
- 919 90 Kelleher, J., Etheridge, A. M. & McVean, G. Efficient Coalescent Simulation and Genealogical Analysis for Large  
920 Sample Sizes. *PLOS Computational Biology* **12**, e1004842, doi:10.1371/journal.pcbi.1004842 (2016).
- 921 91 Beichman, A. C., Phung, T. N. & Lohmueller, K. E. Comparison of Single Genome and Allele Frequency Data  
922 Reveals Discordant Demographic Histories. *G3: Genes/Genomes/Genetics* **7**, 3605-3620,  
923 doi:10.1534/g3.117.300259 (2017).
- 924 92 Schultz, M. D. *et al.* Human body epigenome maps reveal noncanonical DNA methylation variation. *Nature*  
925 **523**, 212-216 (2015).
- 926 93 Ramírez, F. *et al.* deepTools2: a next generation web server for deep-sequencing data analysis. *Nucleic Acids  
927 Research* **44**, W160-W165, doi:10.1093/nar/gkw257 (2016).
- 928 94 Wickham, H. *ggplot2: Elegant Graphics for Data Analysis*. (Springer-Velgag, 2016).

## 929 Acknowledgments

930 We acknowledge the native peoples of California whose relationship with the land has allowed the peoples of  
931 California to benefit from oak ecosystems, and allowed our research team to study oaks. We acknowledge the  
932 University of California Natural Reserve System, and especially the UC-Santa Barbara Sedgwick Reserve, home of  
933 tree SW786. We thank Krista Beckley, Dylan Burge, and Andy Lentz for field work; Krista Beckley for DNA  
934 extractions and library preparation; Marco Morselli for assistance with bisulfite sequencing library preparation;  
935 Suhua Feng for assistance with DNA and RNA sequencing; and Luke Browne for maps in Figure 2. Sequencing was  
936 conducted at the following core facilities: Illumina and PacBio were carried out at the DNA Technologies and

937 Expression Analysis Cores of the UC Davis Genome Center, supported by NIH Shared Instrumentation Grant  
938 1S10OD010786-01; and whole genome resequencing, WGBS, and RNA-Seq for demographics, methylation, and  
939 transcriptomic studies, respectively, were done at the UCLA Broad Stem Cell Genome Core facility. We thank Lily  
940 Shiue and Thomas Swale, Dovetail Genomics, for the high-quality scaffolding performed by HiRise.

941 ***Author contributions***

942 VLS, MP, and SLS conceived the overall project design and management and obtained grant support; VLS initiated,  
943 coordinated, and supervised the project and manuscript. SJC annotated and analyzed genes and repeats, designed  
944 and conducted genome comparative analyses, and created/wrote figures, results, methods, and supplementary  
945 information (SI) these sections. STF-G analyzed methylomes, designed and conducted comparative methylation  
946 analyses, created/wrote figures, results, discussion, methods, and supplementary information (SI) for this topic;  
947 called genetic variants (GATK) for the demographic analysis; submitted genomic resources for public availability.  
948 AVZ and DP assembled and curated the genome sequence and contributed to results, methods, and  
949 supplementary information (SI) for these sections. JG and YZ analyzed genetic variation data. JG conducted  
950 demographic analysis. KEL designed and supervised the demographic analysis and JG and KEL contributed results,  
951 methods, and SI for this section. STF-G and SJC examined DUF247. CLH conducted lab preparation for DNA  
952 sequencing, resequencing, bisulfite sequencing and RNA sequencing. VLS, SJC, STF-G, AVZ, JG, PFG, KEL, MP, and  
953 SLS edited text. SJC edited manuscript figures. SJC, STF-G, and VLS interpreted data and wrote the manuscript.

954 ***Competing interests***

955 The authors declare no competing interests.

956 ***Additional information***

957 **Supplemental Information** (pdf)

958 **Auxiliary documents** (Auxiliary Spreadsheets 1 and 2, Excel document)

959
